# Supplementary material for: Molecular Profiling Reveals Unique Immune and Metabolic Features of Melanoma Brain Metastases
Source: Oxford University Press journal article supplement (doi:10.1158/2159-8290.cd-18-1489), 2019-02-20
Supplement: 21598290cd181489-sup-214070_1_supp_5331893_pmm1x3.xlsx [file 21598290cd181489-sup-214070_1_supp_5331893_pmm1x3.xlsx]

## Sheet: MBMs and ECMs
Table S1: Clinical Characteristics of Melanoma Brain and Extracranial Metastases
Sample ID	RNA-seq ID	WES ID	Patient ID	Accession Site	Gender	Race	Age at Surgery (Years)	Vital Status	OS (Months from Accession)	Age of Block (Months)	Pre_Immuno_YN	Immuno_Agents	Immuno_Interval to Accession (Months)	Pre_Biochemo_YN	Biochemo_Agents	Biochemo_Interval to Accession (Months)	Pre_Chemo_YN	Chemo_Agents	Chemo_Interval to Accession (Months)	Pre_Targeted_YN	Targeted_Agents	Targeted_Interval to Accession (Months)	Pre_XRT_YN	XRT_Regimen	XRT_Interval to Accession (Months)	RNA-seq_YN	WES_YN	TCR-Seq_YN	CD3 IHC_YN	CD8 IHC_YN	PAX5 IHC_YN	PTEN IHC_YN	PD-L1 IHC_YN	β-catenin IHC_YN
18779_BM1	127726	128343	18779	Brain	Male	White	56	Dead	8.96667	61.5	Y	Ipilimumab	4.66667	N	.	.	Y	Cisplatin Temozolomide Vinblastine	7.26667	N	.	.	Y	SRS	7.5	Y	Y	Y	Y	Y	Y	Y	Y	Y
18779_BM2	128117	128442	18779	Brain	Male	White	56	Dead	8.96667	61.5	Y	Ipilimumab	4.66667	N	.	.	Y	Cisplatin Temozolomide Vinblastine	7.26667	N	.	.	Y	SRS	7.5	Y	Y	Y	Y	Y	Y	N	N	N
18779_BM3	128118	128443	18779	Brain	Male	White	56	Dead	8.96667	61.5	Y	Ipilimumab	4.66667	N	.	.	Y	Cisplatin Temozolomide Vinblastine	7.26667	N	.	.	Y	SRS	7.5	Y	Y	Y	Y	Y	Y	N	N	N
18779_ECM2	128161	.	18779	Skin	Male	White	55	Dead	24.1333	76.6667	N	.	.	N	.	.	N	.	.	N	.	.	N	.	.	Y	N	N	N	N	N	N	N	N
18779_ECM1	128156	128496	18779	LN	Male	White	55	Dead	23.4667	76	N	.	.	N	.	.	N	.	.	N	.	.	N	.	.	Y	Y	N	Y	Y	Y	Y	Y	Y
1672_ECM2	128228	.	1672	LN	Male	Hispanic	45	Dead	22.9667	285.8	N	.	.	N	.	.	N	.	.	N	.	.	N	.	.	Y	N	N	Y	Y	Y	Y	Y	Y
1672_ECM1	128199	.	1672	LN	Male	Hispanic	46	Dead	10.7667	273.6	N	.	.	N	.	.	N	.	.	N	.	.	N	.	.	Y	N	N	Y	Y	Y	Y	Y	Y
1672_BM1	127685	.	1672	Brain	Male	Hispanic	47	Dead	6.8	269.633	N	.	.	N	.	.	N	.	.	N	.	.	Y	WBRT	11.8333	Y	N	Y	Y	Y	Y	N	N	N
1672_BM2	127706	.	1672	Brain	Male	Hispanic	47	Dead	2.66667	265.5	N	.	.	N	.	.	N	.	.	N	.	.	Y	WBRT	15.9667	Y	N	Y	Y	Y	Y	Y	Y	Y
613_BM2	127769	.	613	Brain	Female	White	44	Dead	14.2	227.667	N	.	.	Y	Cisplatin Dacarbazine Interferon-alpha (NOS) Interleukin-2 (NOS) Vinblastine	13.2	N	.	.	N	.	.	N	.	.	Y	N	N	N	N	N	N	N	N
613_ECM	128241	.	613	LN	Female	White	43	Dead	28.6333	242.1	N	.	.	N	.	.	N	.	.	N	.	.	N	.	.	Y	N	N	N	N	N	N	N	N
613_BM3	128120	.	613	Brain	Female	White	44	Dead	10.2	223.667	N	.	.	N	.	.	N	.	.	N	.	.	N	.	.	Y	N	N	Y	Y	Y	Y	Y	Y
613_BM1	.	.	613	Brain	Female	White	45	Dead	7.16667	220.633	N	.	.	N	.	.	N	.	.	N	.	.	N	.	.	N	N	N	Y	Y	Y	Y	Y	Y
17802_BM4	128115	.	17802	Brain	Female	White	42	Alive	67.4333	77.6333	N	.	.	N	.	.	Y	Temozolomide	1.6	N	.	.	Y	SRS	1.6	Y	N	N	Y	Y	Y	N	N	N
17802_BM2	127763	128380	17802	Brain	Female	White	43	Alive	62.2667	72.4667	N	.	.	N	.	.	N	.	.	N	.	.	Y	SRS	2.8	Y	Y	Y	Y	Y	Y	N	N	N
17802_BM3	127906	.	17802	Brain	Female	White	43	Alive	57.3	67.5	N	.	.	N	.	.	N	.	.	N	.	.	Y	SRS	7.76667	Y	N	N	Y	Y	Y	N	N	N
17802_BM1	127724	.	17802	Brain	Female	White	44	Alive	44.5333	54.7333	N	.	.	N	.	.	N	.	.	N	.	.	Y	SRS	4.43333	Y	N	N	Y	Y	Y	Y	Y	Y
19247_ECM2	128194	128516	19247	LN	Male	White	64	Dead	25.0333	25.1667	N	.	.	N	.	.	N	.	.	Y	Dabrafenib Trametinib	3.66667	N	.	.	Y	Y	N	Y	Y	Y	Y	Y	Y
19247_ECM1	128139	.	19247	Intestine	Male	White	62	Dead	55.6	55.7333	N	.	.	N	.	.	N	.	.	N	.	.	N	.	.	Y	N	Y	Y	Y	Y	Y	Y	Y
19247_BM	127788	128402	19247	Brain	Male	White	62	Dead	55.1333	55.2667	N	.	.	N	.	.	N	.	.	N	.	.	N	.	.	Y	Y	Y	Y	Y	Y	Y	Y	Y
19247_ECM3	128223	128535	19247	Intestine	Male	White	63	Dead	43	43.1333	N	.	.	N	.	.	N	.	.	N	.	.	N	.	.	Y	Y	Y	Y	Y	N	Y	Y	Y
21965_ECM2	128226	128538	21965	LN	Female	White	35	Dead	9.46667	57.9333	N	.	.	Y	Cisplatin Dacarbazine Interleukin-2 (NOS) Vinblastine Interferon Alfa-2b	0.766667	N	.	.	N	.	.	N	.	.	Y	Y	N	Y	Y	Y	Y	Y	Y
21965_ECM3	128227	128539	21965	Skin	Female	White	35	Dead	3.76667	52.2333	Y	Ipilimumab	2.66667	N	.	.	N	.	.	N	.	.	N	.	.	Y	Y	Y	Y	Y	Y	Y	Y	Y
21965_ECM1	128225	128537	21965	LN	Female	White	35	Dead	12.5667	61.0333	N	.	.	N	.	.	N	.	.	N	.	.	N	.	.	Y	Y	Y	Y	Y	N	Y	Y	Y
21965_BM	127725	128342	21965	Brain	Female	White	35	Dead	2.96667	51.4333	N	.	.	N	.	.	N	.	.	N	.	.	N	.	.	Y	Y	Y	Y	Y	Y	Y	Y	Y
23928_BM2	127783	128398	23928	Brain	Male	White	69	Dead	6.73333	38.8333	Y	Ipilimumab	1.86667	N	.	.	Y	Cisplatin Temozolomide Vinblastine	10.3333	N	.	.	Y	SRS	3.1	Y	Y	N	Y	Y	Y	N	N	N
23928_ECM	128142	128482	23928	LN	Male	White	67	Dead	20.7	52.8	N	.	.	N	.	.	N	.	.	N	.	.	N	.	.	Y	Y	Y	Y	Y	Y	Y	Y	Y
23928_BM1	127762	128379	23928	Brain	Male	White	67	Dead	20.3333	52.4333	N	.	.	N	.	.	N	.	.	N	.	.	N	.	.	Y	Y	Y	Y	Y	Y	Y	Y	Y
23928_BM3	127784	128399	23928	Brain	Male	White	69	Dead	4.16667	36.2667	N	.	.	N	.	.	N	.	.	N	.	.	Y	WBRT	0.733333	Y	Y	Y	Y	Y	Y	N	N	N
24151_ECM3	128259	128565	24151	Skin	Male	White	61	Alive	31.9667	24.1	N	.	.	Y	Temozolomide Ipilimumab	9.83333	Y	Paclitaxel Carboplatin	3.3	N	.	.	N	.	.	Y	Y	Y	Y	Y	N	Y	Y	N
24151_ECM1	128162	128502	24151	Lung	Male	White	60	Alive	49.3333	41.4667	N	.	.	N	.	.	N	.	.	N	.	.	N	.	.	Y	Y	Y	Y	Y	Y	Y	Y	Y
24151_ECM2	128192	128514	24151	Lung	Male	White	60	Alive	45.8333	37.9667	N	.	.	N	.	.	N	.	.	N	.	.	N	.	.	Y	Y	Y	Y	Y	Y	N	Y	Y
24151_BM	128174	128456	24151	Brain	Male	White	60	Alive	45.0333	37.1667	N	.	.	N	.	.	N	.	.	N	.	.	N	.	.	Y	Y	Y	Y	Y	Y	Y	Y	Y
563_ECM1	128198	.	563	LN	Male	White	45	Dead	16.1667	244.733	N	.	.	N	.	.	N	.	.	N	.	.	N	.	.	Y	N	N	Y	Y	Y	Y	Y	Y
563_ECM2	128244	.	563	LN	Male	White	45	Dead	20	248.567	N	.	.	N	.	.	N	.	.	N	.	.	N	.	.	Y	N	N	N	N	N	N	N	N
2564_ECM2	128197	.	2564	Skin	Male	White	18	Dead	7.3	181.467	N	.	.	N	.	.	N	.	.	N	.	.	N	.	.	Y	N	N	N	N	N	N	N	N
2564_ECM1	128196	.	2564	LN	Male	White	18	Dead	7.3	181.467	N	.	.	N	.	.	N	.	.	N	.	.	N	.	.	Y	N	N	Y	Y	Y	Y	Y	Y
5929_BM	127729	128347	5929	Brain	Female	White	66	Dead	13.5667	63.9	N	.	.	N	.	.	Y	Dacarbazine	9.63333	N	.	.	N	.	.	Y	Y	Y	Y	Y	Y	Y	Y	Y
5929_ECM2	128219	128531	5929	Skin	Female	White	64	Dead	33.3333	83.6667	N	.	.	Y	Temozolomide Peginterferon Alfa-2b	10.3	N	.	.	N	.	.	N	.	.	Y	Y	Y	Y	Y	Y	Y	Y	Y
5929_ECM1	128200	128521	5929	Skin	Female	White	65	Dead	27.7	78.0333	N	.	.	N	.	.	N	.	.	N	.	.	N	.	.	Y	Y	Y	Y	Y	Y	Y	Y	Y
6561_BM1	128119	.	6561	Brain	Male	White	56	Dead	2.63333	140.3	N	.	.	N	.	.	N	.	.	N	.	.	N	.	.	Y	N	N	Y	Y	Y	N	N	N
6561_BM2	128121	.	6561	Brain	Male	White	56	Dead	2.63333	140.3	N	.	.	N	.	.	N	.	.	N	.	.	N	.	.	Y	N	N	Y	Y	Y	N	N	N
8824_BM	127908	.	8824	Brain	Male	White	42	Alive	41.1333	36.8333	Y	Pembrolizumab	12.5333	Y	Interleukin-2 (NOS) Cyclophosphamide Fludarabine TIL	6.3	N	.	.	N	.	.	Y	SRS	21.6667	Y	N	N	Y	Y	Y	Y	Y	Y
8824_ECM2	128243	.	8824	LN	Male	White	34	Alive	143.433	139.133	N	.	.	N	.	.	N	.	.	N	.	.	N	.	.	Y	N	N	Y	Y	N	Y	Y	Y
8824_ECM1	128220	.	8824	Intestine	Male	White	41	Alive	59.3333	55.0333	N	.	.	N	.	.	N	.	.	N	.	.	N	.	.	Y	N	Y	Y	Y	N	Y	Y	Y
11825_BM	127751	.	11825	Brain	Female	White	75	Alive	20.5333	16.2667	N	.	.	N	.	.	Y	Dacarbazine Selumetinib	58.2333	N	.	.	N	.	.	Y	N	Y	Y	Y	Y	Y	Y	Y
11825_ECM1	.	.	11825	Lung	Female	White	69	Alive	100.033	95.7667	N	.	.	N	.	.	N	.	.	N	.	.	N	.	.	N	N	N	Y	Y	N	Y	Y	Y
11825_ECM2	.	.	11825	SmallIntestine	Female	White	70	Alive	90.6667	86.4	N	.	.	N	.	.	N	.	.	N	.	.	N	.	.	N	N	N	Y	Y	Y	Y	Y	Y
16649_ECM2	128195	.	16649	Skin	Male	White	60	Dead	31.1	80.6	N	.	.	N	.	.	Y	Temozolomide	7	N	.	.	Y	SRS	5.36667	Y	N	N	N	N	N	N	N	N
16649_BM	127764	128381	16649	Brain	Male	White	62	Dead	12.7333	62.2333	N	.	.	Y	Cisplatin Temozolomide Vinblastine Interleukin-2 (High Dose)	17.2667	N	.	.	N	.	.	Y	SRS	3.5	Y	Y	N	Y	Y	N	Y	Y	Y
16649_ECM1	128141	128481	16649	Intestine	Male	White	62	Dead	4.06667	53.5667	N	.	.	N	.	.	N	.	.	N	.	.	N	.	.	Y	Y	N	Y	Y	Y	Y	Y	Y
18612_ECM1	128222	.	18612	Skin	Female	White	44	Dead	0.633333	61.9333	N	.	.	N	.	.	Y	Lomustine	1.46667	N	.	.	N	.	.	Y	N	Y	Y	Y	Y	Y	Y	Y
18612_ECM2	128262	.	18612	Skin	Female	White	43	Dead	17.7333	79.0333	N	.	.	N	.	.	N	.	.	N	.	.	N	.	.	Y	N	N	Y	Y	Y	Y	Y	Y
18612_BM	127905	.	18612	Brain	Female	White	44	Dead	2.56667	63.8667	N	.	.	N	.	.	N	.	.	N	.	.	Y	SRS	4.13333	Y	N	N	Y	Y	Y	Y	Y	Y
20735_ECM2	128191	.	20735	Intestine	Female	White	31	Dead	19.7	39.3667	N	.	.	N	.	.	N	.	.	Y	Vemurafenib	12.9667	N	.	.	Y	N	Y	Y	Y	Y	Y	Y	Y
20735_BM	127750	.	20735	Brain	Female	White	31	Dead	18.4667	38.1333	N	.	.	N	.	.	Y	Temozolomide	0.766667	N	.	.	Y	SRS	0.666667	Y	N	Y	Y	Y	Y	N	N	Y
20735_ECM1	128138	.	20735	Skin	Female	White	29	Dead	45.3	64.9667	N	.	.	Y	Cisplatin Dacarbazine Interleukin-2 (NOS) Vinblastine	3.96667	N	.	.	N	.	.	N	.	.	Y	N	Y	Y	Y	Y	Y	Y	Y
22193_BM1	127786	.	22193	Brain	Male	White	70	Dead	2.63333	50.3333	N	.	.	Y	Temozolomide Ipilimumab	9.6	Y	Cisplatin Temozolomide Vinblastine	6.1	N	.	.	Y	SRS	2.5	Y	N	Y	Y	Y	N	N	N	N
22193_BM2	128177	.	22193	Brain	Male	White	70	Dead	2.63333	50.3333	N	.	.	Y	Temozolomide Ipilimumab	9.6	Y	Cisplatin Temozolomide Vinblastine	6.1	N	.	.	Y	SRS	2.5	Y	N	Y	Y	Y	N	N	N	N
18024_BM2	127791	128403	18024	Brain	Male	White	51	Dead	24.2667	64.0333	N	.	.	N	.	.	Y	Cisplatin Temozolomide Vinblastine	15	N	.	.	Y	SRS	17.8	Y	Y	N	Y	Y	N	N	N	N
18024_BM1	127681	128307	18024	Brain	Male	White	52	Dead	14.2667	54.0333	N	.	.	N	.	.	N	.	.	N	.	.	Y	SRS	27.8	Y	Y	N	Y	Y	Y	N	N	N
1656_ECM	128239	.	1656	LN	Male	White	52	Dead	8.2	262.367	N	.	.	Y	Cisplatin Dacarbazine Interferon-alpha (NOS) Interleukin-2 (NOS) Vinblastine	2.36667	N	.	.	N	.	.	N	.	.	Y	N	N	Y	Y	Y	Y	Y	Y
1656_BM	127705	.	1656	Brain	Male	White	52	Dead	14.5333	268.7	N	.	.	N	.	.	N	.	.	N	.	.	N	.	.	Y	N	Y	Y	Y	Y	Y	Y	Y
403_ECM	128134	128474	403	Skin	Male	White	49	Dead	7.7	257.567	N	.	.	N	.	.	Y	Cisplatin Dacarbazine Vinblastine	4.8	N	.	.	N	.	.	Y	Y	N	Y	Y	Y	Y	Y	Y
403_BM	127686	128312	403	Brain	Male	White	49	Dead	5.5	255.367	N	.	.	N	.	.	N	.	.	N	.	.	N	.	.	Y	Y	N	Y	Y	N	Y	Y	Y
1739_BM	127707	.	1739	Brain	Female	White	33	Dead	5.36667	247.5	N	.	.	N	.	.	Y	Cisplatin Dacarbazine Vinblastine	11.6333	N	.	.	N	.	.	Y	N	N	Y	Y	Y	Y	Y	Y
1739_ECM	128247	.	1739	LN	Female	White	33	Dead	17.5	259.633	N	.	.	N	.	.	N	.	.	N	.	.	N	.	.	Y	N	N	Y	Y	Y	N	Y	N
6847_ECM	128153	128493	6847	Intestine	Male	White	58	Dead	4.53333	239.767	N	.	.	N	.	.	Y	Temozolomide	1.13333	N	.	.	N	.	.	Y	Y	N	Y	Y	N	Y	Y	Y
6847_BM	.	128313	6847	Brain	Male	White	58	Dead	4.13333	239.367	N	.	.	N	.	.	N	.	.	N	.	.	N	.	.	N	Y	N	Y	Y	N	Y	Y	Y
1027_ECM	128133	.	1027	Skin	Male	White	60	Dead	12.4667	212.7	N	.	.	N	.	.	N	.	.	N	.	.	N	.	.	Y	N	N	Y	Y	Y	Y	Y	Y
1027_BM	.	.	1027	Brain	Male	White	61	Dead	0.833333	201.067	N	.	.	N	.	.	N	.	.	N	.	.	N	.	.	N	N	N	Y	Y	Y	N	N	N
2166_BM1	127710	.	2166	Brain	Male	White	67	Dead	6.8	221.633	N	.	.	N	.	.	N	.	.	N	.	.	N	.	.	Y	N	N	Y	Y	Y	Y	Y	Y
2166_BM2	128113	.	2166	Brain	Male	White	67	Dead	6.56667	221.4	N	.	.	N	.	.	N	.	.	N	.	.	N	.	.	Y	N	N	Y	Y	Y	N	N	N
1929_ECM	128242	.	1929	Lung	Male	White	55	Dead	13.1333	210.633	N	.	.	N	.	.	N	.	.	N	.	.	N	.	.	Y	N	Y	Y	Y	Y	Y	Y	Y
1929_BM	.	.	1929	Brain	Male	White	56	Dead	5.56667	203.067	N	.	.	N	.	.	N	.	.	N	.	.	N	.	.	N	N	N	N	N	N	N	N	Y
789_BM	.	128315	789	Brain	Male	White	43	Dead	8.9	194.1	N	.	.	N	.	.	N	.	.	N	.	.	N	.	.	N	Y	N	N	N	N	N	N	N
789_ECM	.	128475	789	Skin	Male	White	43	Dead	9.9	195.1	N	.	.	Y	Cisplatin Dacarbazine Interferon-alpha (NOS) Interleukin-2 (NOS) Vinblastine	16.8333	N	.	.	N	.	.	N	.	.	N	Y	N	Y	Y	Y	N	Y	Y
6314_BM	128114	.	6314	Brain	Male	White	53	Dead	4.56667	183.367	N	.	.	Y	Cisplatin Interferon-alpha (NOS) Interleukin-2 (NOS) Temozolomide	4.76667	N	.	.	N	.	.	N	.	.	Y	N	N	Y	Y	N	Y	Y	Y
6314_ECM	128136	.	6314	LN	Male	White	53	Dead	10.8333	189.633	N	.	.	N	.	.	N	.	.	N	.	.	N	.	.	Y	N	N	Y	Y	Y	Y	Y	Y
3834_ECM	128246	.	3834	Lung	Male	White	58	Dead	16.4667	58.2667	N	.	.	N	.	.	N	.	.	N	.	.	N	.	.	Y	N	N	N	N	Y	Y	Y	Y
3834_BM	128038	.	3834	Brain	Male	White	58	Dead	9.36667	51.1667	N	.	.	N	.	.	N	.	.	N	.	.	N	.	.	Y	N	N	N	N	Y	Y	Y	Y
5182_ECM	128137	128477	5182	LN	Female	White	69	Alive	146.933	145.9	N	.	.	N	.	.	N	.	.	N	.	.	N	.	.	Y	Y	Y	Y	Y	Y	Y	Y	Y
5182_BM	127767	128384	5182	Brain	Female	White	70	Alive	132.567	131.533	N	.	.	N	.	.	N	.	.	N	.	.	N	.	.	Y	Y	Y	Y	Y	Y	N	N	Y
19545_ECM	128160	.	19545	Lung	Male	White	74	Dead	6.2	41.6	N	.	.	N	.	.	Y	Temozolomide Avastin	15.7667	Y	Vemurafenib	8.23333	N	.	.	Y	N	N	Y	Y	Y	Y	Y	Y
19545_BM	127766	.	19545	Brain	Male	White	74	Dead	4.36667	39.7667	N	.	.	N	.	.	N	.	.	N	.	.	Y	SRS	10.4667	Y	N	N	Y	Y	Y	Y	Y	Y
7254_ECM	128240	.	7254	LN	Male	White	32	Dead	10.3333	149.7	N	.	.	N	.	.	N	.	.	N	.	.	N	.	.	Y	N	N	Y	Y	Y	Y	Y	Y
7254_BM	127765	.	7254	Brain	Male	White	32	Dead	7.3	146.667	N	.	.	N	.	.	N	.	.	N	.	.	N	.	.	Y	N	N	Y	Y	Y	Y	Y	Y
7518_BM	128122	.	7518	Brain	Male	Hispanic	68	Dead	10.0667	102.8	N	.	.	N	.	.	Y	Temozolomide Thalidomide	17.2667	N	.	.	N	.	.	Y	N	Y	Y	Y	N	N	N	N
10875_BM	128179	.	10875	Brain	Male	White	37	Dead	30.4667	66	N	.	.	N	.	.	N	.	.	N	.	.	N	.	.	Y	N	N	N	N	N	N	N	N
10875_ECM	128248	.	10875	Skin	Male	White	37	Dead	28.4667	64	N	.	.	N	.	.	N	.	.	N	.	.	N	.	.	Y	N	N	Y	Y	Y	Y	Y	Y
11405_BM	128181	.	11405	Brain	Female	White	55	Dead	8.56667	90.2	N	.	.	N	.	.	N	.	.	N	.	.	Y	SRS	7.66667	Y	N	Y	Y	Y	Y	Y	Y	Y
11405_ECM	128261	.	11405	Intestine	Female	White	55	Dead	6.2	87.8333	N	.	.	N	.	.	N	.	.	N	.	.	N	.	.	Y	N	Y	Y	Y	Y	Y	Y	Y
18486_BM	128034	.	18486	Brain	Male	White	64	Dead	1.9	64.5333	N	.	.	Y	Cisplatin Dacarbazine Interleukin-2 (NOS) Vinblastine Interferon Alfa-2b	8.2	N	.	.	N	.	.	N	.	.	Y	N	N	Y	Y	Y	Y	Y	N
18486_ECM	128155	.	18486	LN	Male	White	63	Dead	13.5	76.1333	N	.	.	N	.	.	N	.	.	N	.	.	N	.	.	Y	N	N	Y	Y	Y	Y	Y	Y
19627_BM	127682	128308	19627	Brain	Female	White	36	Dead	2.66667	62.6667	N	.	.	Y	Cisplatin Interleukin-2 (NOS) Temozolomide Vinblastine Interferon Alfa-2b	7.9	N	.	.	N	.	.	N	.	.	Y	Y	N	Y	Y	Y	Y	Y	Y
19627_ECM	128224	128536	19627	LN	Female	White	35	Dead	14.3667	74.3667	N	.	.	N	.	.	N	.	.	N	.	.	N	.	.	Y	Y	N	Y	Y	Y	Y	Y	Y
22345_ECM	128158	128498	22345	LN	Female	Asian	25	Dead	11.8333	47.5	N	.	.	Y	Cisplatin Dacarbazine Interleukin-2 (NOS) Vinblastine Interferon Alfa-2b	4.36667	N	.	.	N	.	.	N	.	.	Y	Y	N	Y	Y	Y	Y	Y	Y
22345_BM	127748	128365	22345	Brain	Female	Asian	26	Dead	0.833333	36.5	N	.	.	N	.	.	N	.	.	N	.	.	Y	WBRT	4.66667	Y	Y	N	Y	Y	Y	Y	Y	Y
22771_BM	127746	128363	22771	Brain	Female	White	55	Dead	0.933333	38.5667	N	.	.	Y	Interleukin-2 (NOS) Interleukin-2 (NOS) Cyclophosphamide Fludarabine TIL	5.96667	N	.	.	N	.	.	N	.	.	Y	Y	N	Y	Y	Y	Y	Y	Y
22771_ECM	128140	128480	22771	Skin	Female	White	54	Dead	16.4667	54.1	N	.	.	N	.	.	N	.	.	N	.	.	N	.	.	Y	Y	Y	Y	Y	Y	Y	Y	Y
23393_ECM	128221	128533	23393	LN	Female	White	47	Dead	13.8667	53.5667	N	.	.	N	.	.	N	.	.	N	.	.	N	.	.	Y	Y	Y	Y	Y	Y	Y	Y	Y
23393_BM	127721	128339	23393	Brain	Female	White	47	Dead	7.76667	47.4667	N	.	.	N	.	.	N	.	.	N	.	.	N	.	.	Y	Y	Y	Y	Y	Y	Y	Y	Y
24141_ECM	128193	128515	24141	Lung	Male	White	45	Alive	30.8667	26.5667	N	.	.	Y	Cisplatin Interleukin-2 (NOS) Temozolomide Vinblastine Interferon NOS	17.0333	N	.	.	N	.	.	N	.	.	Y	Y	N	Y	Y	Y	Y	Y	Y
24141_BM	128031	128422	24141	Brain	Male	White	44	Alive	50.6667	46.3667	Y	Ipilimumab	6.83333	N	.	.	N	.	.	N	.	.	Y	SRS	5.83333	Y	Y	N	Y	Y	Y	Y	Y	Y
25377_BM2	128116	128441	25377	Brain	Male	White	30	Dead	0.633333	7.1	Y	Pembrolizumab	10.5667	Y	Temozolomide Ipilimumab	23.5667	Y	Abraxane	4.66667	N	.	.	Y	SRS	20.7333	Y	Y	Y	Y	Y	Y	N	N	N
25377_BM1	127745	128362	25377	Brain	Male	White	28	Dead	29.5333	36	N	.	.	N	.	.	N	.	.	N	.	.	Y	SRS	3.53333	Y	Y	N	Y	Y	Y	Y	Y	Y
21983_BM	127723	128341	21983	Brain	Male	White	48	Dead	66.6333	62.2333	N	.	.	N	.	.	N	.	.	N	.	.	N	.	.	Y	Y	Y	Y	Y	Y	Y	Y	Y
21983_ECM	128157	128497	21983	Intestine	Male	White	53	Dead	13.4	9	Y	Ipilimumab	20.3	N	.	.	N	.	.	Y	Vemurafenib	20.3	Y	SRS	32.6333	Y	Y	Y	Y	Y	Y	Y	Y	Y
19242_BM	127683	.	19242	Brain	Male	White	55	Alive	3.96667	67.1333	N	.	.	N	.	.	Y	Abraxane	8.83333	Y	Dabrafenib Trametinib	7.4	N	.	.	Y	N	N	N	N	N	N	N	N
19242_ECM	.	.	19242	Skin	Male	White	54	Alive	12.9667	76.1333	N	.	.	N	.	.	Y	Bleomycin Cisplatin Dacarbazine	3.63333	N	.	.	N	.	.	N	N	N	Y	Y	N	Y	Y	Y
1660_BM	127702	.	1660	Brain	Female	White	49	Dead	15.7	301.833	N	.	.	N	.	.	N	.	.	N	.	.	unknown	.	.	Y	N	N	Y	Y	Y	Y	Y	Y
1665_BM	127703	.	1665	Brain	Male	White	33	Dead	5.9	299.233	N	.	.	N	.	.	N	.	.	N	.	.	unknown	.	.	Y	N	N	Y	Y	Y	Y	Y	Y
885_BM	127708	.	885	Brain	Female	White	43	Dead	9.56667	247.433	N	.	.	Y	Cisplatin Dacarbazine Interferon-alpha (NOS) Interleukin-2 (NOS) Vinblastine	18.7	N	.	.	N	.	.	N	.	.	Y	N	N	Y	Y	Y	Y	Y	Y
1707_BM	127704	.	1707	Brain	Female	White	30	Dead	15.4	272.933	N	.	.	N	.	.	N	.	.	N	.	.	N	.	.	Y	N	N	Y	Y	Y	Y	Y	Y
6507_BM	128176	.	6507	Brain	Female	White	34	Dead	28.4	267.1	N	.	.	N	.	.	N	.	.	N	.	.	Y	SRS	4.33333	Y	N	N	Y	Y	Y	N	N	N
1710_BM	127771	.	1710	Brain	Male	White	40	Dead	2.1	264.933	N	.	.	N	.	.	Y	Cisplatin Dacarbazine Vinblastine	4.4	N	.	.	N	.	.	Y	N	N	Y	Y	Y	N	N	N
1747_BM	.	.	1747	Brain	Male	White	56	Dead	16.9667	227.567	N	.	.	N	.	.	N	.	.	N	.	.	N	.	.	N	N	N	Y	N	Y	Y	Y	Y
20477_BM	127770	.	20477	Brain	Male	White	61	Dead	8.86667	70.8	N	.	.	N	.	.	N	.	.	N	.	.	N	.	.	Y	N	N	Y	Y	N	N	N	N
1155_BM	128039	.	1155	Brain	Female	White	38	Alive	68.8333	64.0333	N	.	.	N	.	.	N	.	.	N	.	.	N	.	.	Y	N	Y	Y	Y	Y	Y	Y	Y
5946_BM	128037	.	5946	Brain	Female	White	32	Dead	20.2667	57.3	N	.	.	N	.	.	N	.	.	N	.	.	N	.	.	Y	N	Y	Y	Y	Y	Y	Y	Y
6666_BM	127728	.	6666	Brain	Male	White	53	Dead	3.23333	142.467	N	.	.	N	.	.	N	.	.	N	.	.	N	.	.	Y	N	Y	Y	Y	Y	Y	Y	Y
8227_BM	127727	128345	8227	Brain	Female	White	44	Dead	6.06667	122.667	N	.	.	N	.	.	N	.	.	N	.	.	N	.	.	Y	Y	Y	Y	Y	Y	Y	Y	Y
13428_BM	128036	.	13428	Brain	Female	White	51	Dead	11.8667	73.6333	N	.	.	N	.	.	N	.	.	N	.	.	Y	WBRT	2.76667	Y	N	N	Y	Y	Y	Y	Y	Y
11621_BM	128180	128459	11621	Brain	Male	White	44	Dead	7.76667	97.3667	N	.	.	N	.	.	N	.	.	N	.	.	N	.	.	Y	Y	N	Y	Y	Y	N	N	N
11846_BM	128178	.	11846	Brain	Male	White	74	Dead	20.8333	68.4667	N	.	.	N	.	.	N	.	.	N	.	.	Y	SRS	17.6	Y	N	N	N	N	N	N	N	N
12822_BM	127790	.	12822	Brain	Female	White	75	Dead	19.7	99.1	N	.	.	N	.	.	Y	Paclitaxel Temozolomide	2.6	N	.	.	Y	SRS	4.63333	Y	N	N	Y	Y	N	N	N	N
13086_BM	127789	.	13086	Brain	Female	White	32	Dead	19.1	62.9	Y	Ipilimumab	32.7333	N	.	.	Y	Paclitaxel Carboplatin	43.0667	Y	Vemurafenib	27.7	Y	SRS	1.16667	Y	N	N	N	N	N	N	N	N
16460_BM	127907	.	16460	Brain	Male	White	68	Dead	1.46667	63.1333	N	.	.	N	.	.	Y	Paclitaxel Temozolomide	5.06667	N	.	.	Y	SRS	0.633333	Y	N	N	Y	Y	N	N	N	N
17279_BM	128035	.	17279	Brain	Male	White	73	Dead	6.46667	77.2	N	.	.	N	.	.	Y	Temozolomide	8.63333	N	.	.	N	.	.	Y	N	Y	Y	Y	Y	Y	Y	Y
19412_BM	128033	.	19412	Brain	Male	White	76	Dead	2.66667	74.0667	N	.	.	N	.	.	Y	Cisplatin Temozolomide Vinblastine	1.2	N	.	.	Y	SRS	2.13333	Y	N	N	Y	Y	Y	Y	Y	Y
20259_ECM	128159	.	20259	LN	Female	White	36	Alive	50.1	46.6667	N	.	.	Y	Cisplatin Dacarbazine Interleukin-2 (NOS) Vinblastine Interferon Alfa-2b	24.5667	N	.	.	N	.	.	N	.	.	Y	N	N	Y	Y	Y	Y	Y	Y
20539_BM	128032	.	20539	Brain	Male	White	44	Dead	7.2	70.6667	N	.	.	N	.	.	N	.	.	N	.	.	N	.	.	Y	N	Y	Y	Y	Y	Y	Y	Y
20644_BM	127904	.	20644	Brain	Female	White	63	Dead	3.46667	40.4667	N	.	.	N	.	.	N	.	.	N	.	.	N	.	.	Y	N	N	Y	Y	Y	N	N	N
21293_BM	127787	.	21293	Brain	Female	White	35	Dead	14.6667	64.2667	N	.	.	N	.	.	Y	Cisplatin Temozolomide Vinblastine	2.13333	N	.	.	N	.	.	Y	N	Y	Y	Y	N	N	N	N
21798_BM	127903	128413	21798	Brain	Male	White	53	Dead	2.03333	44	N	.	.	Y	Temozolomide Ipilimumab	0.0666667	N	.	.	N	.	.	Y	SRS	0.266667	Y	Y	N	Y	Y	N	N	N	N
22076_BM	127684	.	22076	Brain	Female	White	61	Dead	2.76667	62.9	N	.	.	N	.	.	N	.	.	N	.	.	N	.	.	Y	N	N	Y	Y	Y	N	N	N
22205_BM	127749	128366	22205	Brain	Female	White	55	Dead	11.4667	38.6333	N	.	.	N	.	.	N	.	.	N	.	.	Y	SRS	7.5	Y	Y	N	Y	Y	Y	N	N	N
22362_BM	127722	.	22362	Brain	Male	White	60	Alive	1.53333	60.6333	N	.	.	N	.	.	Y	Dacarbazine Vincristine	6.76667	N	.	.	N	.	.	Y	N	Y	Y	Y	Y	Y	Y	Y
22627_BM	127747	128364	22627	Brain	Male	White	72	Alive	37.3	36.5	N	.	.	Y	Cisplatin Dacarbazine Interleukin-2 (NOS) Vinblastine Interferon NOS	22.4	N	.	.	Y	Vemurafenib	17.2667	N	.	.	Y	Y	Y	Y	Y	Y	Y	Y	Y
23242_BM	128175	.	23242	Brain	Female	White	40	Dead	3.5	52	N	.	.	Y	Cisplatin Interleukin-2 (NOS) Temozolomide Vinblastine Interferon Alfa-2b	1.4	Y	Temozolomide	8.33333	N	.	.	N	.	.	Y	N	N	Y	Y	Y	N	N	N
23376_BM	127902	.	23376	Brain	Female	White	56	Dead	6.3	35.1	Y	Ipilimumab	3.7	N	.	.	N	.	.	Y	Vemurafenib	3.7	Y	SRS	5	Y	N	N	Y	Y	Y	Y	Y	Y
25260_BM	128173	.	25260	Brain	Male	White	47	Dead	2.06667	37.6333	N	.	.	Y	Cisplatin Dacarbazine Interleukin-2 (NOS) Vinblastine Interferon Alfa-2b	9.1	Y	Temozolomide TPI 287	1.4	N	.	.	N	.	.	Y	N	N	Y	Y	Y	Y	Y	Y
25442_BM	127782	.	25442	Brain	Male	White	71	Dead	5	47.7	N	.	.	N	.	.	N	.	.	N	.	.	N	.	.	Y	N	Y	Y	Y	Y	N	N	N
26046_BM	127744	128361	26046	Brain	Female	White	62	Dead	4.56667	35.9	N	.	.	Y	Temozolomide Ipilimumab	4.06667	N	.	.	N	.	.	N	.	.	Y	Y	Y	Y	Y	Y	Y	Y	Y
26444_BM	127743	.	26444	Brain	Male	White	47	Dead	0.866667	41.2333	N	.	.	N	.	.	Y	Temozolomide	7.93333	N	.	.	Y	SRS	0.166667	Y	N	N	Y	Y	Y	Y	Y	Y
26616_BM	127901	.	26616	Brain	Male	White	71	Dead	1	40.8	N	.	.	N	.	.	N	.	.	N	.	.	Y	SRS	0.566667	Y	N	Y	Y	Y	Y	N	N	N
28064_BM	127742	.	28064	Brain	Male	White	61	Alive	2.3	33.9333	N	.	.	N	.	.	N	.	.	N	.	.	N	.	.	Y	N	Y	Y	Y	Y	Y	Y	Y
32797_BM	127900	.	32797	Brain	Male	White	59	Alive	8.4	14.2	Y	Ipilimumab	3.5	N	.	.	N	.	.	N	.	.	Y	SRS	3.5	Y	N	Y	N	N	N	N	N	N

## Sheet: Primary Tumors
Table S1: Clinical Characteristics of Primary Melanomas
Analyte ID	Cohort	Age at Diagnosis (Years)	Gender	Race	AJCC 6th Ed. Stage at Diagnosis	Time to First Recurrence (Months)	CNS Metastasis	Time to First CNS Metastasis (Months)
111065	No Recurrence	60	Female	White	Stage IB
127741	No Recurrence	46	Male	White	Stage IIIB
111079	No Recurrence	46	Female	White	Stage IIB
111002	No Recurrence	77	Male	White	Stage IIA
110440	No Recurrence	19	Male	White	Stage IIA
110442	No Recurrence	58	Female	White	Stage IIIA
111074	No Recurrence	75	Male	White	Equivocal (IIA-IIB)
111064	No Recurrence	45	Male	White	Stage IB
111078	No Recurrence	59	Female	White	Stage IIB
111076	No Recurrence	47	Female	White	Stage IB
110439	No Recurrence	52	Female	White	Stage IIA
111070	No Recurrence	52	Female	Hispanic	Stage IIIB
111080	No Recurrence	42	Male	White	Stage IIIB
111071	No Recurrence	60	Female	White	Stage IIIB
111066	No Recurrence	26	Male	White	Stage IIIA
111063	No Recurrence	56	Female	White	Equivocal (IIIA-IIIB)
111061	No Recurrence	55	Male	White	Stage IIIB
111082	No Recurrence	40	Male	White	Stage IIIB
111068	No Recurrence	70	Female	Hispanic	Stage IIIB
111083	Recurrence/Not Brain	66	Male	White	Stage IIA	9.19918
111067	Recurrence/Not Brain	51	Female	White	Stage IIIB	4.82957
111059	Recurrence/Not Brain	43	Female	Hispanic	Stage IIIB	5.4538
111056	Recurrence/Not Brain	79	Male	White	Stage IIB	3.77823
111004	Recurrence/Not Brain	69	Male	White	Stage IIC	7.32649
111060	Recurrence/Not Brain	69	Female	White	Stage IB	7.65503
111058	Recurrence/Not Brain	47	Male	White	Stage IIC	8.54209
111069	Recurrence/Not Brain	68	Female	White	Stage IB	11.039
111057	Recurrence/Not Brain	66	Male	White	Equivocal (IIA-IIB)	12.846
111073	Recurrence/Not Brain	49	Male	White	Equivocal (IIA-IIB)	14.2587
111075	Recurrence/Not Brain	74	Male	White	Equivocal (IIA-IIB)	15.0801
110438	Recurrence/Not Brain	65	Female	White	Stage IIB	15.8029
111011	Recurrence/Not Brain	53	Male	White	Stage IIIB	11.2361
111007	Recurrence/Not Brain	47	Female	White	Stage IIIB	13.0103
111072	Recurrence/Not Brain	44	Male	White	Stage IIIB	14.9158
110441	Recurrence/Not Brain	66	Male	White	Stage IIIC	8.90349
111062	Recurrence/Brain	54	Male	White	Stage IIIB	15.77	Yes	16
111005	Recurrence/Brain	82	Male	White	Stage IIIB	15.5072	Yes	21.9466
111077	Recurrence/Brain	48	Male	White	Stage IIIA	8.44353	Yes	9.92197
111081	Recurrence/Brain	48	Female	White	Stage IIIA	3.84394	Yes	11.6961
111366	Recurrence/Brain	54	Male	White	Stage IIIC	24.1478	Yes	24.1478
111365	Recurrence/Brain	42	Male	White	Stage IIA	83.5811	Yes	85.3881
111356	Recurrence/Brain	57	Male	White	Stage IIA	106.48	Yes	106.48
111354	Recurrence/Brain	60	Male	White	Stage IIIA	26.3819	Yes	41.2977
111003	Recurrence/Brain	26	Male	White	Stage IIIC	29.0431	Yes	40.2793
111361	Recurrence/Brain	45	Male	White	Stage IIA	94.2259	Yes	101.684
111358	Recurrence/Brain	57	Male	White	Stage IIA	19.5154	Yes	19.5154
111357	Recurrence/Brain	52	Female	White	Stage IIIB	12.616	Yes	12.616
111353	Recurrence/Brain	65	Male	Hispanic	Equivocal (IIB-IIC)	6.89938	Yes	46.193
111351	Recurrence/Brain	67	Male	White	Stage IIIC	7.58932	Yes	58.8747
111363	Recurrence/Brain	70	Male	White	Stage IIC	3.02259	Yes	3.02259
111362	Recurrence/Brain	60	Male	White	Stage IIC	11.729	Yes	16.5257
111359	Recurrence/Brain	57	Male	White	Stage IIB	11.4661	Yes	13.3388
111352	Recurrence/Brain	72	Male	White	Stage IIIA	1.60986	Yes	9.3963
111360	Recurrence/Brain	58	Female	White	Stage IIIC	16.1643	Yes	42.1191
