# Supplementary material for: Molecular Profiling Reveals Unique Immune and Metabolic Features of Melanoma Brain Metastases
Source: Oxford University Press journal article supplement (doi:10.1158/2159-8290.cd-18-1489), 2019-02-20
Supplement: 21598290cd181489-sup-214070_1_supp_5331896_pmm9x3.xlsx [file 21598290cd181489-sup-214070_1_supp_5331896_pmm9x3.xlsx]

## Sheet: Sheet1
Table S2: Differentially Expressed Genes in Patient-Matched MBMs and ECMs
ID	logFC	AveExpr	t	P.Value	adj.P.Val	B
GFAP	7.19059	0.737827	13.5815	2.81946e-20	8.94163e-16	32.2562
CCL21	-5.64225	-2.52781	-9.8335	2.72538e-14	4.32163e-10	20.1049
HBA1	4.30606	2.82234	8.28686	1.22445e-11	1.1133e-07	16.0589
HBB	4.16121	5.62659	8.25257	1.40418e-11	1.1133e-07	16.1562
SULF1	-2.08624	5.56023	-8.1653	1.99028e-11	1.24794e-07	15.7751
RARRES2	-2.66854	0.312122	-8.12259	2.361e-11	1.24794e-07	14.8551
FNDC1	-3.21307	1.60051	-8.03007	3.41866e-11	1.52759e-07	15.0236
HBA2	3.8683	4.94232	8.00016	3.85341e-11	1.52759e-07	15.1834
ITIH2	2.27004	2.1979	7.59531	1.95017e-10	6.87195e-07	13.4117
FGF7	-2.72908	1.62301	-7.50456	2.80507e-10	8.89601e-07	13.1107
COL6A3	-1.60869	7.54533	-7.21203	9.04761e-10	2.60851e-06	11.8347
MXRA5	-2.18949	4.76164	-7.17751	1.03872e-09	2.71368e-06	11.9552
SLC1A2	3.08585	0.195126	7.16038	1.11238e-09	2.71368e-06	11.4104
CTNND2	3.77056	-0.171838	6.90994	3.02373e-09	6.84962e-06	10.3323
SPON1	-2.15694	1.67405	-6.89064	3.2655e-09	6.90415e-06	10.7988
FUT9	3.19481	-4.35355	6.8158	4.39975e-09	8.72086e-06	9.96807
CCL11	-3.97559	-4.82946	-6.70571	6.81732e-09	1.27179e-05	9.5474
ZIC2	3.28426	-0.879076	6.60617	1.01217e-08	1.78333e-05	9.34429
CRISPLD2	-1.36503	3.14677	-6.5923	1.06941e-08	1.78501e-05	9.75937
SVEP1	-1.63136	3.7088	-6.54698	1.27985e-08	2.02945e-05	9.57411
DPT	-3.95177	-2.28467	-6.51686	1.44194e-08	2.17761e-05	8.80169
LUM	-2.06182	4.2559	-6.48823	1.61496e-08	2.32803e-05	9.32378
VSIG4	1.5964	4.52077	6.33407	2.96839e-08	4.05462e-05	8.7272
PPBP	4.08129	-1.06706	6.31853	3.15584e-08	4.05462e-05	8.28873
NTRK3	2.6556	1.12693	6.3153	3.19624e-08	4.05462e-05	8.47478
HMCN2	-2.89726	-0.855378	-6.26309	3.92545e-08	4.78815e-05	8.01271
SLIT2	-1.32813	4.11884	-6.14018	6.35964e-08	7.46999e-05	7.98216
SLC7A14	3.28407	-1.34433	6.10847	7.20033e-08	7.97114e-05	7.4806
CDH20	3.03743	-1.3696	6.10535	7.28899e-08	7.97114e-05	7.39433
FMOD	-1.86328	0.486428	-6.06749	8.45228e-08	8.93519e-05	7.61388
HBD	3.65583	-2.62426	6.01717	1.02874e-07	0.000103266	7.16082
COL15A1	-1.23297	5.46284	-6.01389	1.04198e-07	0.000103266	7.39233
PTGER3	-3.42114	-2.33305	-5.93918	1.39401e-07	0.000133968	6.82456
COMP	-4.22344	-1.31818	-5.89437	1.65923e-07	0.000154767	6.80243
AQP4	3.24272	-0.0625407	5.87447	1.79252e-07	0.000162422	6.84554
PF4	3.36709	-3.40137	5.83897	2.05703e-07	0.000181213	6.57173
SCG2	1.39903	2.9078	5.81149	2.28795e-07	0.000196109	6.8429
NCAN	3.12485	-2.60787	5.7574	2.82013e-07	0.000235362	6.31413
SLC30A10	2.98344	-3.42268	5.71197	3.36029e-07	0.000263998	6.10457
STXBP5	0.586308	7.87127	5.70879	3.40164e-07	0.000263998	5.98819
HAPLN2	2.64911	-3.12984	5.70793	3.41298e-07	0.000263998	6.04202
H19	-2.10936	4.42888	-5.6752	3.8713e-07	0.00029232	6.2269
ABCC9	-1.12039	4.00691	-5.66215	4.07051e-07	0.000300215	6.22385
COL12A1	-1.43941	6.58697	-5.6407	4.4202e-07	0.000318596	5.84262
ABI3BP	-1.94005	4.97245	-5.61878	4.80825e-07	0.000338864	5.96307
COL1A1	-1.67981	8.60699	-5.61013	4.97046e-07	0.000342681	5.47765
SPOCK3	3.11535	-1.85952	5.59417	5.28398e-07	0.000356545	5.85355
AOX1	-1.90326	2.32368	-5.57993	5.5803e-07	0.000368695	6.00808
TDO2	-2.02341	1.08654	-5.55739	6.08314e-07	0.000388743	5.88556
COL5A1	-1.22714	5.97234	-5.55543	6.12889e-07	0.000388743	5.61944
COL14A1	-1.27965	5.2098	-5.53767	6.55941e-07	0.000407893	5.64408
VCAM1	-1.41727	4.08409	-5.49441	7.73688e-07	0.00047186	5.57263
SLC6A1	2.12663	0.998623	5.48622	7.9824e-07	0.000477649	5.58199
CCDC80	-1.36777	5.35192	-5.4653	8.64432e-07	0.000507677	5.33235
CLDN11	2.01894	1.29873	5.44347	9.39284e-07	0.000535456	5.50881
PODN	-2.23708	0.904473	-5.44173	9.45498e-07	0.000535456	5.47698
BCAS1	2.57825	0.276239	5.42668	1.00116e-06	0.000557033	5.34533
GLDN	2.45416	1.05661	5.40323	1.09438e-06	0.000589869	5.31441
TCEAL2	3.12159	-2.61325	5.40251	1.09738e-06	0.000589869	5.11158
RSPO3	-2.95496	-1.06625	-5.37889	1.20013e-06	0.000634349	5.05229
NFATC1	-0.922293	3.08541	-5.34256	1.37704e-06	0.000715927	5.12574
COL3A1	-1.42617	8.99368	-5.3256	1.46816e-06	0.000750986	4.36268
GUCY1A3	-1.09042	3.69704	-5.31332	1.53786e-06	0.000762212	4.96701
GAP43	2.86927	-1.06837	5.31326	1.53817e-06	0.000762212	4.88831
ATP1A2	2.4511	1.85627	5.3019	1.60556e-06	0.000783363	4.99807
SLC39A12	2.78234	-2.41311	5.2651	1.84424e-06	0.000886187	4.56197
HBG2	3.55738	-3.64508	5.26082	1.8742e-06	0.000887139	4.70321
GPM6A	3.08594	-1.14458	5.2409	2.01996e-06	0.000942071	4.59392
IRF8	-1.59066	3.8374	-5.20354	2.32394e-06	0.00106056	4.56201
COL6A2	-1.04144	6.85298	-5.2016	2.3409e-06	0.00106056	4.20364
AOC3	-1.3558	1.80652	-5.18194	2.51978e-06	0.00112553	4.59678
PDGFRA	-1.55225	3.27496	-5.11654	3.21702e-06	0.00140954	4.27623
VGLL3	-1.69828	0.594954	-5.11426	3.24451e-06	0.00140954	4.32083
ADRA2A	-3.09287	-2.45652	-5.10611	3.34451e-06	0.00141683	4.05298
SLC38A11	1.77693	1.91053	5.10562	3.35063e-06	0.00141683	4.31932
TMEM176A	-1.37916	2.34216	-5.09086	3.53978e-06	0.00147711	4.27064
ANKRD20A4	1.16249	2.74995	5.02891	4.45525e-06	0.00183117	3.97264
ELAVL3	2.43926	-4.26346	5.02337	4.54753e-06	0.00183117	3.91722
CD1C	-2.63276	-0.981546	-5.01936	4.61565e-06	0.00183117	3.91127
GRM3	2.1575	-0.789626	5.01915	4.6192e-06	0.00183117	3.8901
ERG	-1.21043	1.43389	-5.00553	4.85797e-06	0.00189511	3.98696
CCL19	-3.25669	-1.15993	-5.0032	4.9e-06	0.00189511	3.87975
GABRG2	2.36964	-1.37346	4.98559	5.22937e-06	0.00199812	3.89721
ZFP36L1	-0.489097	4.97404	-4.96359	5.67176e-06	0.00213278	3.58421
MEOX2	-2.90751	-2.22457	-4.96146	5.71628e-06	0.00213278	3.79629
ADORA3	1.28107	3.24218	4.9531	5.89528e-06	0.00217399	3.74764
ZIC1	2.15586	0.473292	4.92634	6.5053e-06	0.00237137	3.67738
MPEG1	-1.16746	4.07785	-4.92153	6.62141e-06	0.00237264	3.52094
HIVEP1	-0.430158	6.72856	-4.92002	6.65842e-06	0.00237264	3.21373
NKX6-2	2.41938	-4.20421	4.91129	6.87525e-06	0.00242269	3.53432
CACNA1A	1.93758	0.955247	4.89765	7.22837e-06	0.00249451	3.59166
DNER	2.72941	-0.443592	4.89735	7.23639e-06	0.00249451	3.59206
HSPE1P4	1.90662	-1.46278	4.88261	7.63812e-06	0.00260468	3.348
MT3	2.93259	-3.6749	4.86875	8.03575e-06	0.00271113	3.37282
BICC1	-1.25387	3.3564	-4.86299	8.20696e-06	0.00271159	3.38376
SCN2A	1.75276	2.00178	4.86295	8.20813e-06	0.00271159	3.49359
CD163	1.22376	7.39315	4.85219	8.53779e-06	0.00279142	2.91763
SLC38A3	2.7658	-1.75762	4.84456	8.77902e-06	0.002841	3.30032
FABP4	-2.80581	-1.61968	-4.84082	8.90008e-06	0.00285108	3.29809
MOBP	2.90291	-3.27987	4.83194	9.19319e-06	0.00291553	3.28336
CXCL9	-2.12899	2.87219	-4.81572	9.75358e-06	0.00306262	3.20447
MT2P1	1.6254	-1.72033	4.81107	9.92011e-06	0.00308438	3.12763
CILP	-2.58732	-0.938987	-4.80791	1.00353e-05	0.0030899	3.22001
C1orf87	2.28145	-4.25807	4.78608	1.08648e-05	0.00331314	3.14587
TJP2	-0.581606	4.82547	-4.77994	1.11104e-05	0.00335577	2.96557
XPNPEP2	-2.48673	-2.59206	-4.7682	1.15944e-05	0.00346891	3.07699
SIM2	1.87343	0.311696	4.74586	1.2573e-05	0.00370365	3.10145
SMARCA2	-0.531234	7.32267	-4.745	1.26125e-05	0.00370365	2.51269
MMP9	-1.87252	3.51869	-4.72325	1.36461e-05	0.00397039	2.89214
VEGFC	-1.13048	0.76526	-4.70858	1.4389e-05	0.00414848	2.98418
CADM2	2.68475	-1.84407	4.67368	1.63198e-05	0.00466276	2.79289
CD40	-0.991822	3.69553	-4.6656	1.68016e-05	0.00475755	2.67711
WNT2	-3.09843	-3.23247	-4.65966	1.71648e-05	0.00478857	2.65385
COL5A2	-0.89449	6.98468	-4.65888	1.72131e-05	0.00478857	2.26321
COL1A2	-1.11774	9.3389	-4.65345	1.75521e-05	0.00481223	1.88909
ATP8A2	1.33996	1.5339	4.6516	1.76696e-05	0.00481223	2.79698
ADAM12	-0.802832	4.81721	-4.6462	1.80158e-05	0.00481223	2.48837
CREG2	2.47901	-4.14059	4.64571	1.80473e-05	0.00481223	2.67489
KIF5A	2.62384	1.22345	4.64557	1.80569e-05	0.00481223	2.77806
GBP3	-0.797269	4.90162	-4.61894	1.98674e-05	0.00525062	2.38077
THY1	-0.876089	2.48262	-4.61075	2.04595e-05	0.00536242	2.61383
SULF2	-0.791194	4.51161	-4.60718	2.07226e-05	0.00538685	2.40231
EEF1A2	2.29571	-0.938087	4.60324	2.10168e-05	0.00541893	2.61723
MMP13	-2.99801	-1.10054	-4.59991	2.12693e-05	0.00543981	2.55606
DPY19L3	0.421088	6.34226	4.58648	2.23159e-05	0.00566182	2.11086
ARID1A	-0.330504	8.33108	-4.56937	2.37222e-05	0.00597084	1.76975
CDH9	3.12242	-3.70574	4.55777	2.47242e-05	0.00609362	2.36689
STEAP2	-1.76054	1.13979	-4.55748	2.47499e-05	0.00609362	2.48966
CYP4F3	2.51332	-2.79241	4.55706	2.47864e-05	0.00609362	2.39083
LAMC3	1.12693	3.5723	4.5542	2.50404e-05	0.00610871	2.35509
GABBR2	2.63381	-1.72166	4.54283	2.60754e-05	0.0062718	2.35941
CXCL12	-1.30429	3.79847	-4.54071	2.62731e-05	0.0062718	2.22658
BEX1	2.10258	-3.3604	4.5404	2.63022e-05	0.0062718	2.39639
EPHB2	-1.06765	2.08886	-4.53757	2.6568e-05	0.0062879	2.38873
SOX2	1.60019	0.439378	4.53451	2.68587e-05	0.00630961	2.41378
LGI1	2.7456	-1.6922	4.52491	2.77921e-05	0.00647691	2.31312
ADCY8	2.31922	-2.28182	4.52147	2.81331e-05	0.00647691	2.26796
DAW1	2.3765	-3.5286	4.52	2.8281e-05	0.00647691	2.28984
IRF1	-0.984849	4.35087	-4.51894	2.83878e-05	0.00647691	2.09557
ALK	0.836005	4.69554	4.49888	3.04814e-05	0.00690491	2.02772
FOXP1	-0.769999	5.31399	-4.49534	3.08671e-05	0.00694269	1.9211
LIFR	-1.07715	4.01057	-4.48205	3.23548e-05	0.00718263	2.01627
MKLN1	0.363162	8.16351	4.48177	3.23868e-05	0.00718263	1.50615
CDC42EP3	0.511941	3.81786	4.47443	3.32382e-05	0.00732025	2.02936
LAMP3	-2.0716	0.9318	-4.46363	3.4532e-05	0.00748987	2.18505
APLP1	2.07035	1.31364	4.46322	3.45816e-05	0.00748987	2.18404
C3	-1.55523	6.45118	-4.46212	3.47169e-05	0.00748987	1.62666
GSTM3	1.09905	3.41067	4.45413	3.57107e-05	0.00763398	1.99602
IL4I1	-1.27465	1.05874	-4.4529	3.58663e-05	0.00763398	2.14998
SLC1A3	0.944793	5.39801	4.44221	3.72446e-05	0.0078446	1.74487
TRAJ13	-2.25501	-1.41355	-4.43981	3.75602e-05	0.0078446	2.07416
FMO1	-2.11279	-0.848218	-4.43784	3.78216e-05	0.0078446	2.08418
TIE1	-0.957821	2.38954	-4.43767	3.78452e-05	0.0078446	2.0597
C3orf70	0.99043	1.36059	4.43293	3.84815e-05	0.00792469	2.08322
CNTNAP4	2.66516	1.51898	4.42987	3.88991e-05	0.00795901	2.07761
DPYSL3	-0.875143	4.04824	-4.42013	4.02553e-05	0.00816989	1.82509
TNFRSF4	-2.17746	-3.18772	-4.4188	4.0445e-05	0.00816989	1.86845
MCCD1	2.02931	-4.76842	4.40883	4.1887e-05	0.00836243	1.94325
DIRC3	1.37784	-1.08135	4.40857	4.19255e-05	0.00836243	1.89748
STAP1	-2.14641	-0.899662	-4.39269	4.43304e-05	0.00876293	1.93274
GCH1	-1.20446	2.48535	-4.39139	4.45331e-05	0.00876293	1.87771
AC104667.3	1.47706	-2.3395	4.38992	4.47624e-05	0.00876293	1.8477
NWD1	2.4836	-2.11098	4.38611	4.53647e-05	0.00882635	1.78993
DNASE2B	1.76942	0.453405	4.3828	4.58948e-05	0.00887504	1.90901
RGS16	-1.22223	1.03478	-4.37648	4.69217e-05	0.00901281	1.90677
HEMGN	2.66706	-0.759044	4.37456	4.72386e-05	0.00901281	1.86954
LPPR1	1.93008	-2.27326	4.37322	4.74598e-05	0.00901281	1.85073
TIFAB	-2.17697	-4.61007	-4.36991	4.80131e-05	0.00906362	1.85826
IDO1	-1.74025	1.29673	-4.36142	4.94612e-05	0.00928172	1.82594
TAP1	-0.717977	6.67466	-4.35196	5.11233e-05	0.00950758	1.24403
SFRP2	-2.20674	0.63467	-4.35118	5.12643e-05	0.00950758	1.82076
VNN3	2.03733	-1.21272	4.34728	5.19661e-05	0.00958169	1.78947
LRRC15	-3.53816	-2.87373	-4.33939	5.34171e-05	0.00979232	1.70823
STAT1	-0.747285	9.27666	-4.33603	5.40481e-05	0.00985104	0.826292
GAS6	-0.833986	3.52717	-4.32426	5.63121e-05	0.0101171	1.56453
TNNT3	-2.28684	-1.47972	-4.32388	5.63863e-05	0.0101171	1.68576
ITGA10	1.28737	5.59415	4.32245	5.66673e-05	0.0101171	1.23772
CD69	-1.55073	1.51049	-4.32186	5.67837e-05	0.0101171	1.7104
ASB4	2.58801	-1.1204	4.31471	5.82151e-05	0.0103142	1.71252
FOXC2	2.47962	-1.96922	4.28302	6.49915e-05	0.0114278	1.5612
TRAJ4	-2.25379	-2.59333	-4.282	6.52213e-05	0.0114278	1.53193
AKNA	-0.973984	4.85062	-4.2745	6.69402e-05	0.0116481	1.23004
SLTM	-0.275357	7.41116	-4.27257	6.73891e-05	0.0116481	0.892141
CCDC75P1	1.44448	-4.33547	4.2706	6.78505e-05	0.0116481	1.56475
CXCL14	-2.8247	-2.15202	-4.26835	6.838e-05	0.0116481	1.53421
SNCB	2.24798	-3.07716	4.26819	6.84194e-05	0.0116481	1.53294
PLAU	-0.938631	2.2897	-4.26708	6.86825e-05	0.0116481	1.4866
ADAMTS12	-1.15239	2.93567	-4.26487	6.92104e-05	0.0116752	1.43304
NFKB2	-0.673247	4.67418	-4.25688	7.11489e-05	0.0119387	1.1889
CHRNA6	1.63043	0.771986	4.25376	7.19209e-05	0.0120047	1.51242
MLC1	2.32886	-0.714919	4.24318	7.45987e-05	0.0123035	1.45181
CNTN2	1.64985	1.03212	4.24222	7.48486e-05	0.0123035	1.48487
HMOX1	1.19626	5.43503	4.24212	7.48744e-05	0.0123035	1.08411
ZIC3	2.22915	-4.20261	4.23859	7.57924e-05	0.0123901	1.44068
KIAA0922	-0.526404	6.64347	-4.23516	7.66935e-05	0.0124731	0.860774
BGN	-0.989276	5.49234	-4.22927	7.82673e-05	0.0126641	0.991409
RP11-758N13.1	-1.97169	-5.66174	-4.22248	8.01222e-05	0.0128354	1.40999
MMP2	-1.23518	5.94556	-4.22182	8.03034e-05	0.0128354	0.885508
AHSP	2.34665	-4.57039	4.21998	8.0814e-05	0.0128354	1.39784
FKBP5	1.08984	6.37741	4.21951	8.09444e-05	0.0128354	0.891316
UBL5	0.524561	5.94047	4.21368	8.25876e-05	0.0130308	0.899859
C1orf63	-0.485348	6.42645	-4.20368	8.54775e-05	0.01342	0.798936
OPTN	-0.535252	7.09429	-4.20201	8.59693e-05	0.0134307	0.695209
COL6A5	-2.4403	0.290003	-4.20043	8.64372e-05	0.0134376	1.35661
BCL11A	-2.07741	-0.431663	-4.1949	8.80968e-05	0.0135687	1.32748
PBX3	-0.53996	4.14557	-4.19477	8.81361e-05	0.0135687	1.05508
RUNDC3B	1.07777	0.911163	4.19067	8.93865e-05	0.0136947	1.32701
TECTB	2.1638	-4.23294	4.1869	9.05483e-05	0.0137728	1.28209
BNIP3	0.664146	4.0854	4.18621	9.07651e-05	0.0137728	1.03203
RALYL	2.1491	-3.24407	4.18377	9.15286e-05	0.0137781	1.27767
TIMP4	2.52932	-1.58111	4.18332	9.16686e-05	0.0137781	1.23745
SYT14L	1.8859	-4.49133	4.18027	9.26334e-05	0.0138574	1.27113
GRM8	2.04188	-0.0251174	4.17332	9.48669e-05	0.0141249	1.25317
SLC22A3	-2.28697	-0.707675	-4.16977	9.60278e-05	0.014231	1.25131
SPAG4	0.875539	2.6525	4.16699	9.69451e-05	0.0143001	1.14452
ARHGEF15	-1.3206	0.503418	-4.16199	9.86191e-05	0.0144797	1.23786
ST8SIA3	2.6077	-3.63322	4.15607	0.000100637	0.0146954	1.19141
LIPG	-1.70994	0.418008	-4.15419	0.000101286	0.0146954	1.21508
GBP1	-1.09402	5.78132	-4.15136	0.00010227	0.0146954	0.682547
ADIPOR2	0.515574	5.70713	4.15082	0.00010246	0.0146954	0.712975
EXOC3L4	-2.46237	-3.19522	-4.15019	0.00010268	0.0146954	1.14431
IL15RA	-1.25861	1.3092	-4.14791	0.000103485	0.0146954	1.17922
SYNJ1	0.321263	6.1556	4.14782	0.000103515	0.0146954	0.656686
GATSL3	1.60218	-1.86353	4.14703	0.000103796	0.0146954	1.08051
MUC3A	-1.44106	1.85733	-4.14232	0.00010548	0.0148675	1.10159
TMEM119	-2.59014	-2.91181	-4.14098	0.000105962	0.0148693	1.07857
RFX5	-0.41992	5.45771	-4.13938	0.000106542	0.0148838	0.719306
IL33	-1.72701	1.52662	-4.13812	0.000107004	0.0148838	1.11897
EVL	-0.887796	5.22424	-4.135	0.000108146	0.0149312	0.724259
PHACTR2	-0.64214	4.96795	-4.13404	0.000108504	0.0149312	0.745347
POU2F2	-1.25066	0.705679	-4.13335	0.000108757	0.0149312	1.15019
NKD2	-1.86444	-1.41031	-4.13027	0.000109905	0.0150238	1.10322
ELOVL2	1.00137	3.60305	4.11737	0.000114843	0.0156315	0.839752
ST6GALNAC3	0.822795	3.30465	4.11297	0.000116579	0.0158	0.931086
HLA-F	-0.80343	5.37203	-4.1087	0.000118285	0.015963	0.610219
ZNF469	-0.919487	4.1439	-4.10285	0.000120662	0.0162147	0.767936
FBN1	-0.845412	7.119	-4.10001	0.000121828	0.0163024	0.342525
SHISA3	-2.26063	-4.77345	-4.09563	0.000123656	0.0164745	1.01876
PTGIR	-2.17513	-4.01138	-4.09322	0.000124672	0.0164745	0.958477
PPP2R2C	2.38033	-2.66841	4.09322	0.000124673	0.0164745	1.00104
RP11-1094M14.4	-1.72469	-3.09063	-4.08424	0.000128531	0.0169138	0.946765
CREB3L1	-1.68274	0.786214	-4.08268	0.000129213	0.0169333	0.989524
ARPP21	1.89498	-0.889967	4.06975	0.000134997	0.0176185	0.9519
SDK1	-1.12655	2.64573	-4.06721	0.000136164	0.0176652	0.810562
TPSB2	-1.84285	-5.37792	-4.06655	0.000136469	0.0176652	0.944884
ADAMTSL1	-1.48168	1.9854	-4.0645	0.000137421	0.0176925	0.869694
SNORD115-2	1.42483	-5.98355	4.06307	0.000138084	0.0176925	0.938022
F3	0.959348	2.95574	4.0625	0.000138353	0.0176925	0.790009
ADAMTS2	-1.05721	3.61502	-4.05524	0.00014179	0.0180591	0.690145
NPTX2	2.23341	-1.02862	4.04801	0.000145297	0.0184318	0.891513
RELB	-0.703609	3.28608	-4.04327	0.000147638	0.0185837	0.693543
WDFY4	-1.18396	5.53178	-4.04322	0.000147666	0.0185837	0.378015
GBP4	-1.02381	4.24574	-4.03656	0.000151022	0.0189309	0.485581
PLA2G2A	-2.98374	-1.25116	-4.03423	0.000152209	0.0190045	0.844474
CLSTN3	-0.825344	4.63918	-4.0318	0.000153461	0.0190857	0.457779
IL1R2	1.84721	1.63356	4.02914	0.000154843	0.0191823	0.804625
THBS1	-0.799813	7.13983	-4.02508	0.000156978	0.0193712	0.12098
CR2	-3.20148	-0.442709	-4.01847	0.000160511	0.0196914	0.801883
NLRC5	-0.914604	6.93147	-4.01733	0.000161125	0.0196914	0.0971047
CYR61	-0.873504	5.45042	-4.01676	0.000161435	0.0196914	0.320852
PROZ	1.29238	0.066037	4.01265	0.000163682	0.0198148	0.784587
INHBA	-1.587	-0.179322	-4.01262	0.000163697	0.0198148	0.784737
GPR98	1.42335	4.24761	4.00811	0.000166198	0.0200411	0.498019
GREM1	-2.45957	-2.10297	-4.00061	0.000170436	0.0204743	0.729642
LIN7A	1.80757	-0.391271	3.99773	0.000172092	0.0205952	0.725324
MIR765	1.30797	-0.524322	3.99475	0.000173826	0.0207245	0.717644
CXCR1	2.39233	-2.38088	3.99002	0.000176604	0.0209632	0.688872
MRGPRF	-2.05448	-2.95374	-3.98847	0.000177526	0.0209632	0.624725
OLFML3	0.830944	3.10207	3.98799	0.000177811	0.0209632	0.511886
CD36	-0.91338	4.4789	-3.98339	0.000180571	0.0212097	0.339441
SNORD82	1.41892	-1.57155	3.98207	0.000181374	0.0212255	0.635244
PHYHIP	1.954	-2.62674	3.97726	0.000184315	0.0214903	0.642521
PRDX6	0.372569	6.50167	3.97311	0.000186893	0.0217111	0.047858
ABLIM1	-0.786557	4.29615	-3.968	0.000190118	0.0220051	0.310434
ZMYND8	0.390059	7.4119	3.96581	0.000191511	0.0220399	-0.112227
SLC7A11	1.03694	3.56208	3.96535	0.000191808	0.0220399	0.429434
DAAM2	0.548877	6.86495	3.96015	0.000195172	0.0223454	-0.0494838
HSD3BP5	0.932776	3.25745	3.95904	0.000195897	0.0223478	0.401995
TRAM1L1	1.3303	-0.227562	3.95576	0.00019805	0.0224325	0.617086
RFWD2P1	1.79361	-3.60773	3.95534	0.000198331	0.0224325	0.592313
SCARF1	-0.761448	1.30885	-3.95469	0.000198762	0.0224325	0.598793
ETNK2	0.642652	3.73922	3.95188	0.000200632	0.0225633	0.360596
FAT4	-0.93929	5.32222	-3.95025	0.000201727	0.0226063	0.108424
SNRPG	0.509365	5.00294	3.94773	0.000203433	0.0227172	0.158736
CLIC5	-1.64046	-1.5483	-3.94659	0.000204203	0.0227232	0.558711
CDH11	-0.993555	4.29187	-3.94439	0.000205712	0.0227666	0.241856
LRP1B	1.66592	2.54597	3.94392	0.00020603	0.0227666	0.433142
TNFSF10	-1.29485	2.83801	-3.93902	0.000209421	0.023061	0.378081
PPP1R9A	0.746953	5.48107	3.92986	0.000215908	0.0236464	0.00993135
LOXL1	-1.32894	1.19553	-3.92942	0.000216228	0.0236464	0.518403
GAPDHP71	1.80007	-2.96461	3.92707	0.000217924	0.0236754	0.465695
GPR37L1	2.1054	-3.66252	3.92698	0.000217986	0.0236754	0.491454
MAGI1	-0.885768	3.33325	-3.92501	0.000219421	0.0237499	0.313829
TNFRSF25	-1.38866	0.573585	-3.92355	0.000220488	0.0237842	0.515413
TRPC7	2.01367	-3.02904	3.92094	0.000222407	0.0239099	0.509941
SLC10A1	1.07777	1.65485	3.91851	0.00022421	0.0240222	0.459801
CXCL10	-1.6096	2.94001	-3.9163	0.000225866	0.0241182	0.261076
PPP1R42	1.9526	-2.61093	3.91473	0.000227045	0.0241628	0.453983
AVPR1A	-1.25193	0.0166841	-3.90999	0.000230645	0.0244594	0.482498
NCR3	-1.97486	-3.6999	-3.90852	0.000231773	0.0244594	0.454167
FRRS1L	2.08029	-3.678	3.90804	0.000232146	0.0244594	0.470312
STMN4	2.61586	-3.22457	3.90599	0.00023373	0.0245448	0.444439
WT1-AS	-2.45688	-3.38946	-3.90282	0.000236196	0.0246411	0.440925
NUP210L	0.608191	3.55898	3.90261	0.00023636	0.0246411	0.201836
SYNPO	-0.653657	5.17599	-3.90183	0.000236979	0.0246411	-0.013544
SLAMF7	-1.45637	3.45777	-3.89974	0.000238626	0.0247314	0.124245
GPR179	0.936514	1.41623	3.89849	0.000239614	0.0247529	0.412814
PMP2	2.1375	0.409806	3.89272	0.000244237	0.0251485	0.429356
MFAP5	-2.68255	-2.06396	-3.89073	0.000245856	0.0252012	0.403138
KIF26B	-1.01886	4.37921	-3.88937	0.000246963	0.0252012	0.0598505
SV2A	0.923194	1.80633	3.88916	0.000247133	0.0252012	0.356834
MEIS1	-0.67424	3.38132	-3.88421	0.000251212	0.025535	0.164466
DNAJC6	0.887831	3.66889	3.88254	0.000252608	0.0255949	0.141407
EFCAB9	1.65732	-1.77189	3.8809	0.000253983	0.0256522	0.364896
IGLC2	-1.79877	2.41126	-3.87828	0.000256186	0.0257927	0.137329
STAC2	1.89341	-2.48913	3.87649	0.000257713	0.0258643	0.366793
TNFSF13B	-0.833469	3.48347	-3.87033	0.000263011	0.0263127	0.0849781
LBH	-0.98901	2.26669	-3.86933	0.000263879	0.0263166	0.246397
GAPDHP1	0.717937	2.22683	3.86798	0.000265053	0.0263508	0.249596
SPP1	1.24058	8.63202	3.86123	0.000271022	0.0268599	-0.629153
KIAA1462	-0.761282	2.93348	-3.85859	0.000273396	0.0270109	0.152648
USP53	0.660235	7.16486	3.85152	0.000279839	0.0274393	-0.439515
GPR126	0.789638	6.36597	3.85101	0.000280307	0.0274393	-0.334741
SLC4A1	2.43535	-1.25962	3.85099	0.000280328	0.0274393	0.298552
DPYSL5	2.17393	-2.17447	3.84598	0.000284986	0.0278094	0.290212
SH3GL3	2.29637	-2.56297	3.84188	0.000288863	0.028047	0.270256
CLEC10A	-1.45752	-0.556939	-3.84153	0.000289189	0.028047	0.281126
CD1B	-1.89422	-4.13667	-3.84004	0.000290617	0.0280995	0.270363
SRI	0.361457	5.68039	3.83659	0.000293924	0.0283328	-0.284783
CACNG7	1.77283	-4.79856	3.83274	0.000297668	0.0286068	0.257081
UNC5B	-0.957446	2.37761	-3.831	0.000299376	0.0286841	0.134232
GBX1	2.2275	-2.4229	3.82899	0.000301363	0.0287874	0.224484
CCL2	-1.02411	2.9641	-3.82538	0.00030495	0.0290426	0.0406083
PAQR6	0.65386	1.76302	3.82074	0.000309631	0.0294001	0.14966
EMB	-1.02585	3.73522	-3.81867	0.000311737	0.0294565	-0.104381
DAAM1	-0.374473	6.53605	-3.81833	0.000312083	0.0294565	-0.4541
QPCT	0.995955	7.01116	3.81728	0.000313164	0.029467	-0.564845
DMRT3	-1.64113	-5.22412	-3.81642	0.000314052	0.029467	0.210423
PDE8B	0.669775	3.40954	3.81337	0.000317203	0.0295442	-0.0149729
TMEFF2	1.86434	-1.73399	3.81308	0.000317499	0.0295442	0.190749
PBX1	-1.03545	2.09742	-3.81292	0.000317669	0.0295442	0.100225
C8orf4	-1.32588	0.63915	-3.80995	0.000320781	0.0297059	0.175008
BRINP1	2.2161	-3.2829	3.80947	0.000321281	0.0297059	0.1753
CABP1	2.14522	-2.23295	3.80461	0.000326437	0.0300949	0.153675
UNC13C	2.55291	-0.657791	3.80268	0.0003285	0.0301972	0.170933
JAK3	-0.87054	4.43675	-3.80093	0.000330384	0.0302826	-0.254471
NRSN1	2.42755	-4.49462	3.79834	0.000333199	0.0304526	0.143711
COL6A1	-0.6913	7.00052	-3.79492	0.000336943	0.0307063	-0.607757
KCNQ3	1.17938	1.4085	3.79308	0.00033898	0.0308035	0.118553
USH2A	1.19062	3.15253	3.78929	0.000343198	0.0310977	-0.130581
TRAJ9	-2.04602	-2.10948	-3.7872	0.000345552	0.0312218	0.11894
AMER2	1.96444	-4.1425	3.78589	0.000347035	0.0312667	0.121442
FAM107B	-1.1219	2.88421	-3.78285	0.000350496	0.0313767	-0.0787835
FAM107A	1.7412	-1.81394	3.78174	0.000351765	0.0313767	0.0851341
PRKAG3	1.72088	0.338355	3.78152	0.000352015	0.0313767	0.110293
SLC4A10	1.88975	-0.161673	3.78135	0.000352214	0.0313767	0.109769
LYVE1	1.22394	1.79782	3.77577	0.000358679	0.0317827	0.0292041
ANO1	-1.15957	2.65172	-3.77569	0.000358775	0.0317827	-0.108975
TAPBP	-0.405681	5.6564	-3.77353	0.000361314	0.0318772	-0.477351
TRAJ30	-2.01186	-2.96113	-3.77307	0.000361852	0.0318772	0.0686864
PHACTR3	1.38079	0.559632	3.76929	0.000366329	0.0321821	0.0739623
DLL3	1.3981	1.95215	3.76259	0.000374416	0.0327689	-0.0569166
C1orf222	2.0577	-3.0887	3.76205	0.000375074	0.0327689	0.0124248
IL32	-1.30283	1.21222	-3.75675	0.000381586	0.0332462	-0.0305428
FANCB	0.478318	4.69255	3.75196	0.000387579	0.0336758	-0.409898
ACVRL1	-0.802854	2.62808	-3.75001	0.000390047	0.0337977	-0.140578
HEG1	-0.560637	6.06436	-3.7476	0.000393109	0.0339702	-0.60368
CSTF1	0.408806	5.16165	3.74365	0.000398176	0.0343145	-0.489865
EPSTI1	-1.00402	4.38782	-3.7407	0.000402007	0.0345508	-0.431719
DEFA3	1.83809	-5.29244	3.73936	0.000403765	0.0346081	-0.0133038
TUBB1	0.952906	2.94759	3.73676	0.000407173	0.0348061	-0.183019
SNORD115-17	0.83725	-6.76805	3.73362	0.00041135	0.0350687	-0.0770081
STMN1	0.652095	6.86508	3.73002	0.000416164	0.035384	-0.767348
LINC00632	1.6864	-3.45032	3.72815	0.000418702	0.0355046	-0.0459773
PLAC8	-1.90408	0.212872	-3.72576	0.000421945	0.0356	-0.0656501
APOL3	-1.0884	2.66525	-3.72567	0.000422073	0.0356	-0.265643
DRC1	1.93383	-1.85357	3.72149	0.000427819	0.0359184	-0.0937486
ADH1B	-2.30287	-0.877517	-3.72081	0.00042877	0.0359184	-0.0622974
KCNK6	-1.63305	-0.559078	-3.71839	0.000432133	0.0359184	-0.071549
SYT16	2.1801	-3.45005	3.71823	0.000432354	0.0359184	-0.0761294
PDLIM3	-0.859563	4.06083	-3.71795	0.000432742	0.0359184	-0.4571
SLITRK3	1.88911	-3.41742	3.71713	0.000433891	0.0359184	-0.0750665
SNORD113-8	1.65874	-2.6554	3.71685	0.000434297	0.0359184	-0.0952881
UNC13A	1.38745	1.0214	3.71451	0.000437588	0.0359184	-0.126176
CD52	-1.31905	0.213292	-3.71402	0.000438279	0.0359184	-0.0964842
ARHGDIG	2.02331	-4.56089	3.71392	0.000438424	0.0359184	-0.0841479
MIR873	1.88941	-3.66038	3.71319	0.000439464	0.0359184	-0.0995719
TEX26	1.79842	-4.20187	3.71316	0.000439498	0.0359184	-0.084006
MOG	1.93776	0.663063	3.71241	0.000440571	0.0359184	-0.118024
CIITA	-1.11538	5.90045	-3.71078	0.000442889	0.0360148	-0.749683
IL6	-1.59244	-0.0474748	-3.70884	0.000445679	0.036149	-0.108938
CD274	-1.02204	1.85025	-3.70639	0.000449213	0.0361517	-0.204018
MAX	-0.324223	5.29701	-3.70625	0.00044942	0.0361517	-0.632019
SMAD7	-0.753292	0.840969	-3.70603	0.000449734	0.0361517	-0.115829
PCYOX1	0.416604	5.31812	3.70566	0.000450272	0.0361517	-0.631585
TRAJ5	-2.14258	-2.385	-3.70411	0.00045254	0.0362421	-0.123351
EPYC	-2.95552	-4.14024	-3.70251	0.000454873	0.0362499	-0.142461
TCTE1	1.71292	-4.47919	3.70248	0.000454924	0.0362499	-0.115261
EXPH5	-1.44149	0.693432	-3.70084	0.000457335	0.0363507	-0.140131
XRCC6P5	1.16792	-5.62985	3.69902	0.000460034	0.0364738	-0.140008
STX17	-0.364261	4.46233	-3.69263	0.000469601	0.0370221	-0.564834
PON2	0.414907	6.64405	3.69261	0.000469624	0.0370221	-0.860711
ATP10B	0.667698	5.6513	3.69207	0.000470452	0.0370221	-0.710536
IL4R	-0.738989	4.64865	-3.69089	0.000472242	0.037071	-0.591921
FCHSD2	-0.554347	5.73261	-3.68738	0.000477604	0.0373993	-0.749834
MLKL	-0.762011	2.5516	-3.68638	0.000479154	0.0374283	-0.326584
ST18	1.91721	-0.353747	3.68516	0.000481027	0.0374823	-0.16395
TRBC2	-1.52909	3.00428	-3.68341	0.000483749	0.037602	-0.47414
MORN4	0.813152	1.53809	3.6803	0.000488608	0.0378869	-0.238259
PSMB8	-0.49945	5.04783	-3.67864	0.000491234	0.0379975	-0.690148
NFIB	-0.58476	5.09667	-3.67772	0.000492679	0.0380166	-0.688005
BACH2	-1.2478	0.793342	-3.67544	0.000496305	0.0382035	-0.219499
FYB	-0.857604	6.36876	-3.67141	0.000502775	0.0385285	-0.899569
RBFOX1	2.05767	-2.8351	3.6713	0.000502958	0.0385285	-0.209038
TULP2	1.47412	0.519752	3.67002	0.000505019	0.0385932	-0.220367
SOD1	0.417046	7.50336	3.66859	0.000507345	0.0386777	-1.05053
LSP1	-0.959653	2.54576	-3.66566	0.000512138	0.0389495	-0.396521
PTPRN	1.62915	-1.00285	3.664	0.000514872	0.0390638	-0.222931
HCK	-0.742696	3.31285	-3.66216	0.000517928	0.0392019	-0.487844
PLA2G7	-0.923593	4.00055	-3.65534	0.000529377	0.0398576	-0.609562
TPM1	-0.543252	6.85717	-3.65509	0.000529801	0.0398576	-1.00127
BTBD18	0.613216	3.6944	3.65476	0.000530362	0.0398576	-0.567319
ANXA6	-0.393581	6.84766	-3.65125	0.000536355	0.039978	-1.00922
IGHV4-34	-1.96614	-0.376044	-3.65099	0.000536803	0.039978	-0.323824
SMIM1	1.73012	-2.52588	3.65094	0.000536885	0.039978	-0.264379
EGLN3	-1.06819	1.40611	-3.65048	0.000537688	0.039978	-0.33153
C7orf73	0.365666	5.0133	3.65014	0.000538267	0.039978	-0.755953
PCSK7	-0.512421	4.37531	-3.6481	0.000541788	0.0401454	-0.683862
ATCAY	2.27298	-3.5592	3.64597	0.000545502	0.0403265	-0.276809
BCL9L	-0.402993	4.87803	-3.64111	0.00055405	0.0408631	-0.785181
IFIT1B	1.23714	-0.582937	3.63815	0.000559318	0.0411559	-0.293623
TNFRSF18	-1.82423	-3.663	-3.63728	0.000560868	0.0411745	-0.319513
RPSAP43	1.61793	-4.84549	3.63603	0.000563113	0.0412438	-0.300658
LILRB2	-0.851348	2.50684	-3.63485	0.000565251	0.041305	-0.475525
IL18BP	-0.705409	2.96938	-3.63391	0.000566951	0.041334	-0.525082
MYOZ2	1.36897	-0.268342	3.63078	0.000572647	0.0415644	-0.315199
HPN	0.961158	2.49779	3.62904	0.000575827	0.0415644	-0.607563
KRT18P62	1.27466	-4.45193	3.62872	0.000576412	0.0415644	-0.319751
C1orf61	2.04247	-1.35103	3.62868	0.000576487	0.0415644	-0.326053
NCBP2	0.304921	4.43291	3.62832	0.000577158	0.0415644	-0.75299
FLT4	-0.890027	1.60889	-3.62746	0.000578745	0.0415644	-0.384002
RCAN1	0.663053	5.49251	3.62717	0.000579286	0.0415644	-0.90732
ANKRD7	1.23148	0.614439	3.62175	0.00058938	0.0421932	-0.371808
TBC1D2B	-0.337124	5.54847	-3.61515	0.000601915	0.0429935	-0.942731
SELP	-1.15935	0.764204	-3.61322	0.000605628	0.0431615	-0.389296
FMNL1	-0.71807	4.77293	-3.6119	0.000608178	0.0432021	-0.85404
ATP1A1	0.495447	10.7021	3.61151	0.000608921	0.0432021	-1.71058
DLL1	-1.13496	0.409324	-3.60704	0.000617643	0.0436579	-0.402003
ALPK2	-1.39757	0.84866	-3.60681	0.000618099	0.0436579	-0.422795
GRIN1	2.01196	-1.06749	3.60412	0.000623421	0.0439359	-0.388675
SCN1A	1.58052	0.877881	3.60279	0.000626059	0.0439887	-0.431032
KIAA0556	0.466988	6.41523	3.60234	0.000626944	0.0439887	-1.0904
DGKB	1.68882	-0.431104	3.59935	0.000632946	0.0441459	-0.400849
RIMS1	1.9547	-0.719075	3.59882	0.000634006	0.0441459	-0.402778
OSMR	-0.748011	5.59205	-3.59818	0.000635287	0.0441459	-0.98715
FOXN3	-0.484523	3.48037	-3.59678	0.000638136	0.0441459	-0.715573
PPAP2C	1.17922	0.121474	3.59643	0.00063883	0.0441459	-0.460144
PLCL2	-0.731017	4.86458	-3.59639	0.00063892	0.0441459	-0.913924
NRGN	1.70727	-4.25396	3.59606	0.000639587	0.0441459	-0.418442
SELL	-1.37151	2.64697	-3.5957	0.00064032	0.0441459	-0.629141
TNFSF15	-2.02255	-2.24775	-3.59281	0.000646233	0.0444569	-0.43885
PHYHIPL	1.62711	-0.193567	3.59179	0.000648329	0.0445045	-0.422468
SRRM4	1.92234	-4.34438	3.59109	0.000649757	0.0445063	-0.423427
WNK4	0.932912	5.43635	3.58842	0.000655295	0.0447889	-1.05697
TSPAN18	-1.24787	0.761825	-3.58471	0.000663045	0.0450713	-0.468667
TTLL7	0.568195	4.22137	3.58423	0.000664048	0.0450713	-0.830137
BAZ2A	-0.240259	7.7944	-3.58407	0.000664386	0.0450713	-1.34777
CYLD	-0.510607	6.65559	-3.58373	0.000665113	0.0450713	-1.19266
C3orf27	1.26897	-6.42279	3.5763	0.000680951	0.0459576	-0.496797
UBA7	-0.773654	4.78788	-3.57624	0.000681089	0.0459576	-0.97487
CSF2RB	-1.05729	3.50877	-3.57413	0.000685657	0.0460868	-0.809455
TLR7	-1.06203	2.97448	-3.57401	0.00068591	0.0460868	-0.739052
FAM135B	1.51508	-0.666078	3.56591	0.000703726	0.0471835	-0.505963
PHF11	-0.603889	4.8571	-3.56454	0.000706766	0.0471835	-1.00341
TNIP1	-0.351094	5.56614	-3.56413	0.000707696	0.0471835	-1.09671
IL2RG	-1.20314	2.52886	-3.56391	0.000708184	0.0471835	-0.724287
DES	-2.74533	-1.31789	-3.56076	0.000715271	0.0475558	-0.516179
CTSL3P	1.43844	-4.40611	3.55908	0.000719061	0.0477077	-0.513643
ATG12P2	1.36465	-4.69964	3.55359	0.000731649	0.0483826	-0.526554
PML	-0.477911	5.58093	-3.55325	0.000732414	0.0483826	-1.12639
CPXM2	-1.72378	-0.229023	-3.55265	0.00073381	0.0483826	-0.56397
BAZ1A	-0.377905	7.28784	-3.55073	0.000738265	0.0485039	-1.37969
INMT	-1.76079	-3.50461	-3.5501	0.000739732	0.0485039	-0.535809
ARHGAP17	-0.302305	5.9365	-3.54967	0.000740735	0.0485039	-1.19323
CD247	-1.45615	0.754207	-3.54909	0.000742105	0.0485039	-0.590795
IKZF1	-1.17908	3.23741	-3.54858	0.000743297	0.0485039	-0.850598
RNASE1	0.988507	5.03379	3.54657	0.000748023	0.0486413	-1.09385
OLFML2B	-0.774103	2.48504	-3.54592	0.000749553	0.0486413	-0.744885
C6orf132	-1.9247	-1.55413	-3.5454	0.000750773	0.0486413	-0.555967
JUP	-0.937334	2.77455	-3.54508	0.000751538	0.0486413	-0.782757
GRIA2	1.773	0.785673	3.54335	0.00075564	0.0488073	-0.649492
ZNF192P1	1.33089	-5.49749	3.5398	0.000764136	0.0491905	-0.568391
SLC30A2	1.87108	-1.87601	3.53958	0.000764675	0.0491905	-0.565382
TSHZ2	-1.37824	0.836209	-3.53508	0.000775597	0.0497921	-0.63818
