# Supplementary material for: Molecular Profiling Reveals Unique Immune and Metabolic Features of Melanoma Brain Metastases
Source: Oxford University Press journal article supplement (doi:10.1158/2159-8290.cd-18-1489), 2019-02-20
Supplement: 21598290cd181489-sup-214070_1_supp_5331898_pmm4x3.xlsx [file 21598290cd181489-sup-214070_1_supp_5331898_pmm4x3.xlsx]

## Sheet: MSigDB_Hallmarks
Table S3: Pathway Analysis of Intracranial and Subcutaneous Melanoma Xenografts
MSigDB Gene	A375	A375-R1	MEWO	WM1361A
Sets
Hallmarks	1. OXIDATIVE_PHOSPHORYLATION	1. OXIDATIVE_PHOSPHORYLATION	1. OXIDATIVE_PHOSPHORYLATION	1. P53_PATHWAY
	2. MYC_TARGETS_V1	2. DNA_REPAIR	2. MYC_TARGETS_V1	2. TNFA_SIGNALING_VIA_NFKB
	3. REACTIVE_OXIGEN_SPECIES_PATHWAY	3. P53_PATHWAY	3. UNFOLDED_PROTEIN_RESPONSE	3. OXIDATIVE_PHOSPHORYLATION
	4. DNA_REPAIR	4. REACTIVE_OXIGEN_SPECIES_PATHWAY	4. DNA_REPAIR	4. ADIPOGENESIS
	5. ADIPOGENESIS	5. APOPTOSIS	5. PROTEIN_SECRETION	5. HYPOXIA
	6. MYC_TARGETS_V2	6. ADIPOGENESIS	6. MTORC1_SIGNALING	6. REACTIVE_OXIGEN_SPECIES_PATHWAY
	7. MTORC1_SIGNALING	7. TNFA_SIGNALING_VIA_NFKB	7. ADIPOGENESIS	7. DNA_REPAIR
	8. FATTY_ACID_METABOLISM	8. MYC_TARGETS_V1	8. MYC_TARGETS_V2	8. MYC_TARGETS_V2
	9. P53_PATHWAY	9. CHOLESTEROL_HOMEOSTASIS	9. FATTY_ACID_METABOLISM	9. UV_RESPONSE_UP
	10. CHOLESTEROL_HOMEOSTASIS	10. UNFOLDED_PROTEIN_RESPONSE	10. XENOBIOTIC_METABOLISM	10. APOPTOSIS
	11. APOPTOSIS	11. UV_RESPONSE_UP	11. PI3K_AKT_MTOR_SIGNALING	11. INFLAMMATORY_RESPONSE
	12. UNFOLDED_PROTEIN_RESPONSE	12. MTORC1_SIGNALING	12. E2F_TARGETS	12. GLYCOLYSIS
	13. INTERFERON_ALPHA_RESPONSE	13. INTERFERON_ALPHA_RESPONSE	13. PEROXISOME	13. UNFOLDED_PROTEIN_RESPONSE
	14. PEROXISOME	14. GLYCOLYSIS	14. REACTIVE_OXIGEN_SPECIES_PATHWAY	14. APICAL_JUNCTION
	15. PROTEIN_SECRETION	15. FATTY_ACID_METABOLISM	15. PANCREAS BETA CELLS	15. INTERFERON_ALPHA_RESPONSE
	16. PI3K AKT MTOR SIGNALING	16. MYC TARGETS V2	16. ANDROGEN RESPONSE	16. EPITHELIAL MESENCHYMAL TRANSITION
	17. E2F TARGETS	17. E2F TARGETS	17. CHOLESTEROL HOMEOSTASIS	17. MYOGENESIS
	18. GLYCOLYSIS	18. HYPOXIA	18. HEME METABOLISM	18. INTERFERON GAMMA RESPONSE
	19. UV RESPONSE UP	19. INTERFERON GAMMA RESPONSE	19. G2M CHECKPOINT	19. MYC TARGETS V1
	20. INTERFERON GAMMA RESPONSE	20. PEROXISOME	20. TGF BETA SIGNALING	20. PI3K AKT MTOR SIGNALING
EGSEA, sort by median rank (adj.p.val≤0.001)

## Sheet: MSigDB_c2
Table S3: Pathway Analysis of Intracranial and Subcutaneous Melanoma Xenografts
MSigDB Gene	A375	A375-R1	MEWO	WM1361A
Sets
c2: Curated Gene Sets	1.KEGG_RIBOSOME	1.KEGG_RIBOSOME	1.REACTOME_PROCESSING_OF_CAPPED_INTRON_ CONTAINING_PRE_MRNA	1.AMIT_EGF_RESPONSE_120_HELA
	2.REACTOME_PEPTIDE_CHAIN_ELONGATION	2.REACTOME_RNA_POL_I_PROMOTER_OPENING	2.REACTOME_MRNA_SPLICING	2.SAGIV_CD24_TARGETS_DN
	3.REACTOME_SRP_DEPENDENT_COTRANSLATIONAL_ PROTEIN_TARGETING_TO_MEMBRANE	3.REACTOME_AMYLOIDS	3.MOOTHA_VOXPHOS	3.DACOSTA_UV_RESPONSE_VIA_ERCC3_TTD_UP
	4.REACTOME_RNA_POL_I_PROMOTER_OPENING	4.REACTOME_PACKAGING_OF_TELOMERE_ENDS	4.REACTOME_MRNA_PROCESSING	4.KIM_LRRC3B_TARGETS
	5.REACTOME_INFLUENZA_VIRAL_RNA_TRANSCRIPTION_AND_REPLICATION	5.REACTOME_RESPIRATORY_ELECTRON_TRANSPORT	5.KEGG_SPLICEOSOME	5.KOBAYASHI_EGFR_SIGNALING_6HR_DN
	6.MOOTHA_VOXPHOS	6.REACTOME_RESPIRATORY_ELECTRON_TRANSPORT_ATP_SYNTHESIS_BY_CHEMIOSMOTIC_COUPLING_ AND_HEAT_PRODUCTION_BY_UNCOUPLING_PROTEINS	6.REACTOME_DESTABILIZATION_OF_MRNA_BY_AUF1_ HNRNP_D0	6.CREIGHTON_AKT1_SIGNALING_VIA_MTOR_DN
	7.REACTOME_3_UTR_MEDIATED_TRANSLATIONAL_ REGULATION	7.MOOTHA_VOXPHOS	7.REACTOME_RESPIRATORY_ELECTRON_TRANSPORT_ ATP_SYNTHESIS_BY_CHEMIOSMOTIC_COUPLING_AND_ HEAT_PRODUCTION_BY_UNCOUPLING_PROTEINS	7.KERLEY_RESPONSE_TO_CISPLATIN_UP
	8.REACTOME_RESPIRATORY_ELECTRON_TRANSPORT	8.REACTOME_TELOMERE_MAINTENANCE	8.REACTOME_AUTODEGRADATION_OF_CDH1_BY_CDH1_ APC_C	8.LIN_APC_TARGETS
	9.REACTOME_AMYLOIDS	9.REACTOME_ACTIVATION_OF_THE_MRNA_UPON_ BINDING_OF_THE_CAP_BINDING_COMPLEX_AND_EIFS_ AND_SUBSEQUENT_BINDING_TO_43S	9.REACTOME_MITOCHONDRIAL_PROTEIN_IMPORT	9.NIKOLSKY_BREAST_CANCER_21Q22_AMPLICON
	10.REACTOME_PACKAGING_OF_TELOMERE_ENDS	10.KRIGE_AMINO_ACID_DEPRIVATION	10.REACTOME_RNA_POL_II_TRANSCRIPTION	10.TAKAO_RESPONSE_TO_UVB_RADIATION_UP
	11.REACTOME_RESPIRATORY_ELECTRON_TRANSPORT_ATP_SYNTHESIS_BY_CHEMIOSMOTIC_COUPLING_AND_HEAT_PRODUCTION_BY_UNCOUPLING_PROTEINS_	11.REACTOME_DEPOSITION_OF_NEW_CENPA_ CONTAINING_NUCLEOSOMES_AT_THE_CENTROMERE	11.SCHLOSSER_MYC_TARGETS_REPRESSED_BY_SERUM	11.CHIBA_RESPONSE_TO_TSA
	12.REACTOME_ACTIVATION_OF_THE_MRNA_UPON_BINDING_OF_THE_CAP_BINDING_COMPLEX_AND_EIFS_ AND_SUBSEQUENT_BINDING_TO_43S	12.CHNG_MULTIPLE_MYELOMA_HYPERPLOID_UP	12.REACTOME_MRNA_SPLICING_MINOR_PATHWAY	12.AMIT_EGF_RESPONSE_480_HELA
	13.WONG_MITOCHONDRIA_GENE_MODULE	13.KEGG_OXIDATIVE_PHOSPHORYLATION	13.REACTOME_RESPIRATORY_ELECTRON_TRANSPORT	13.NIKOLSKY_BREAST_CANCER_16P13_AMPLICON
	14.REACTOME_TRANSLATION	14.REACTOME_FORMATION_OF_THE_TERNARY_ COMPLEX_AND_SUBSEQUENTLY_THE_43S_COMPLEX	14.REACTOME_RNA_POL_II_PRE_TRANSCRIPTION_EVENTS	14.LI_DCP2_BOUND_MRNA
	15.CHNG_MULTIPLE_MYELOMA_HYPERPLOID_UP	15.REACTOME_TCA_CYCLE_AND_RESPIRATORY_ ELECTRON_TRANSPORT	15.REACTOME_PROCESSING_OF_CAPPED_INTRON_ CONTAINING_PRE_MRNA	15.GENTILE_UV_LOW_DOSE_UP
	16.REACTOME FORMATION OF THE TERNARY COMPLEX AND SUBSEQUENTLY THE 43S COMPLEX	16.REACTOME SRP DEPENDENT COTRANSLATIONAL PROTEIN TARGETING TO MEMBRANE	16.REACTOME REGULATION OF MRNA STABILITY BY PROTEINS THAT BIND AU RICH ELEMENTS	16.GALLUZZI PREVENT MITOCHONDIAL PERMEABILIZATION
	17.REACTOME RNA POL I TRANSCRIPTION	17.REACTOME INFLUENZA VIRAL RNA TRANSCRIPTION AND REPLICATION	17.WONG MITOCHONDRIA GENE MODULE	17.MARTINEZ RESPONSE TO TRABECTEDIN UP
	18.REACTOME TELOMERE MAINTENANCE	18.REACTOME MEIOTIC RECOMBINATION	18.REACTOME APC C CDC20 MEDIATED DEGRADATION OF MITOTIC PROTEINS	18.CHOW RASSF1 TARGETS DN
	19.REACTOME NONSENSE MEDIATED DECAY ENHANCED BY THE EXON JUNCTION COMPLEX	19.REACTOME PEPTIDE CHAIN ELONGATION	19.REACTOME P53 INDEPENDENT G1 S DNA DAMAGE CHECKPOINT	19.WHITESIDE CISPLATIN RESISTANCE DN
	20.REACTOME DEPOSITION OF NEW CENPA CONTAINING NUCLEOSOMES AT THE CENTROMERE	20.REACTOME 3 UTR MEDIATED TRANSLATIONAL REGULATION	20.SCHUHMACHER MYC TARGETS UP	20.TSAI DNAJB4 TARGETS UP
EGSEA, sort by median rank (adj.p.val≤0.001)
