# Supplementary material for: Molecular Profiling Reveals Unique Immune and Metabolic Features of Melanoma Brain Metastases
Source: Oxford University Press journal article supplement (doi:10.1158/2159-8290.cd-18-1489), 2019-02-20
Supplement: 21598290cd181489-sup-214070_1_supp_5331905_pmm5x3.xlsx [file 21598290cd181489-sup-214070_1_supp_5331905_pmm5x3.xlsx]

## Sheet: Sheet1
Table S4: KEGG Metabolism Gene Sets
Pathway Name	MSigDB Link
KEGG GLYCOLYSIS GLUCONEOGENESIS	http://www.broadinstitute.org/gsea/msigdb/cards/KEGG_GLYCOLYSIS_GLUCONEOGENESIS
KEGG CITRATE CYCLE TCA CYCLE	http://www.broadinstitute.org/gsea/msigdb/cards/KEGG_CITRATE_CYCLE_TCA_CYCLE
KEGG PENTOSE PHOSPHATE PATHWAY	http://www.broadinstitute.org/gsea/msigdb/cards/KEGG_PENTOSE_PHOSPHATE_PATHWAY
KEGG PENTOSE AND GLUCURONATE INTERCONVERSIONS	http://www.broadinstitute.org/gsea/msigdb/cards/KEGG_PENTOSE_AND_GLUCURONATE_INTERCONVERSIONS
KEGG FRUCTOSE AND MANNOSE METABOLISM	http://www.broadinstitute.org/gsea/msigdb/cards/KEGG_FRUCTOSE_AND_MANNOSE_METABOLISM
KEGG GALACTOSE METABOLISM	http://www.broadinstitute.org/gsea/msigdb/cards/KEGG_GALACTOSE_METABOLISM
KEGG ASCORBATE AND ALDARATE METABOLISM	http://www.broadinstitute.org/gsea/msigdb/cards/KEGG_ASCORBATE_AND_ALDARATE_METABOLISM
KEGG FATTY ACID METABOLISM	http://www.broadinstitute.org/gsea/msigdb/cards/KEGG_FATTY_ACID_METABOLISM
KEGG STEROID BIOSYNTHESIS	http://www.broadinstitute.org/gsea/msigdb/cards/KEGG_STEROID_BIOSYNTHESIS
KEGG PRIMARY BILE ACID BIOSYNTHESIS	http://www.broadinstitute.org/gsea/msigdb/cards/KEGG_PRIMARY_BILE_ACID_BIOSYNTHESIS
KEGG STEROID HORMONE BIOSYNTHESIS	http://www.broadinstitute.org/gsea/msigdb/cards/KEGG_STEROID_HORMONE_BIOSYNTHESIS
KEGG OXIDATIVE PHOSPHORYLATION	http://www.broadinstitute.org/gsea/msigdb/cards/KEGG_OXIDATIVE_PHOSPHORYLATION
KEGG PURINE METABOLISM	http://www.broadinstitute.org/gsea/msigdb/cards/KEGG_PURINE_METABOLISM
KEGG PYRIMIDINE METABOLISM	http://www.broadinstitute.org/gsea/msigdb/cards/KEGG_PYRIMIDINE_METABOLISM
KEGG ALANINE ASPARTATE AND GLUTAMATE METABOLISM	http://www.broadinstitute.org/gsea/msigdb/cards/KEGG_ALANINE_ASPARTATE_AND_GLUTAMATE_METABOLISM
KEGG GLYCINE SERINE AND THREONINE METABOLISM	http://www.broadinstitute.org/gsea/msigdb/cards/KEGG_GLYCINE_SERINE_AND_THREONINE_METABOLISM
KEGG CYSTEINE AND METHIONINE METABOLISM	http://www.broadinstitute.org/gsea/msigdb/cards/KEGG_CYSTEINE_AND_METHIONINE_METABOLISM
KEGG VALINE LEUCINE AND ISOLEUCINE DEGRADATION	http://www.broadinstitute.org/gsea/msigdb/cards/KEGG_VALINE_LEUCINE_AND_ISOLEUCINE_DEGRADATION
KEGG VALINE LEUCINE AND ISOLEUCINE BIOSYNTHESIS	http://www.broadinstitute.org/gsea/msigdb/cards/KEGG_VALINE_LEUCINE_AND_ISOLEUCINE_BIOSYNTHESIS
KEGG LYSINE DEGRADATION	http://www.broadinstitute.org/gsea/msigdb/cards/KEGG_LYSINE_DEGRADATION
KEGG ARGININE AND PROLINE METABOLISM	http://www.broadinstitute.org/gsea/msigdb/cards/KEGG_ARGININE_AND_PROLINE_METABOLISM
KEGG HISTIDINE METABOLISM	http://www.broadinstitute.org/gsea/msigdb/cards/KEGG_HISTIDINE_METABOLISM
KEGG TYROSINE METABOLISM	http://www.broadinstitute.org/gsea/msigdb/cards/KEGG_TYROSINE_METABOLISM
KEGG PHENYLALANINE METABOLISM	http://www.broadinstitute.org/gsea/msigdb/cards/KEGG_PHENYLALANINE_METABOLISM
KEGG TRYPTOPHAN METABOLISM	http://www.broadinstitute.org/gsea/msigdb/cards/KEGG_TRYPTOPHAN_METABOLISM
KEGG BETA ALANINE METABOLISM	http://www.broadinstitute.org/gsea/msigdb/cards/KEGG_BETA_ALANINE_METABOLISM
KEGG TAURINE AND HYPOTAURINE METABOLISM	http://www.broadinstitute.org/gsea/msigdb/cards/KEGG_TAURINE_AND_HYPOTAURINE_METABOLISM
KEGG SELENOAMINO ACID METABOLISM	http://www.broadinstitute.org/gsea/msigdb/cards/KEGG_SELENOAMINO_ACID_METABOLISM
KEGG GLUTATHIONE METABOLISM	http://www.broadinstitute.org/gsea/msigdb/cards/KEGG_GLUTATHIONE_METABOLISM
KEGG STARCH AND SUCROSE METABOLISM	http://www.broadinstitute.org/gsea/msigdb/cards/KEGG_STARCH_AND_SUCROSE_METABOLISM
KEGG N GLYCAN BIOSYNTHESIS	http://www.broadinstitute.org/gsea/msigdb/cards/KEGG_N_GLYCAN_BIOSYNTHESIS
KEGG OTHER GLYCAN DEGRADATION	http://www.broadinstitute.org/gsea/msigdb/cards/KEGG_OTHER_GLYCAN_DEGRADATION
KEGG O GLYCAN BIOSYNTHESIS	http://www.broadinstitute.org/gsea/msigdb/cards/KEGG_O_GLYCAN_BIOSYNTHESIS
KEGG AMINO SUGAR AND NUCLEOTIDE SUGAR METABOLISM	http://www.broadinstitute.org/gsea/msigdb/cards/KEGG_AMINO_SUGAR_AND_NUCLEOTIDE_SUGAR_METABOLISM
KEGG GLYCOSAMINOGLYCAN DEGRADATION	http://www.broadinstitute.org/gsea/msigdb/cards/KEGG_GLYCOSAMINOGLYCAN_DEGRADATION
KEGG GLYCOSAMINOGLYCAN BIOSYNTHESIS CHONDROITIN SULFATE	http://www.broadinstitute.org/gsea/msigdb/cards/KEGG_GLYCOSAMINOGLYCAN_BIOSYNTHESIS_CHONDROITIN_SULFATE
KEGG GLYCOSAMINOGLYCAN BIOSYNTHESIS KERATAN SULFATE	http://www.broadinstitute.org/gsea/msigdb/cards/KEGG_GLYCOSAMINOGLYCAN_BIOSYNTHESIS_KERATAN_SULFATE
KEGG GLYCOSAMINOGLYCAN BIOSYNTHESIS HEPARAN SULFATE	http://www.broadinstitute.org/gsea/msigdb/cards/KEGG_GLYCOSAMINOGLYCAN_BIOSYNTHESIS_HEPARAN_SULFATE
KEGG GLYCEROLIPID METABOLISM	http://www.broadinstitute.org/gsea/msigdb/cards/KEGG_GLYCEROLIPID_METABOLISM
KEGG INOSITOL PHOSPHATE METABOLISM	http://www.broadinstitute.org/gsea/msigdb/cards/KEGG_INOSITOL_PHOSPHATE_METABOLISM
KEGG GLYCOSYLPHOSPHATIDYLINOSITOL GPI ANCHOR BIOSYNTHESIS	http://www.broadinstitute.org/gsea/msigdb/cards/KEGG_GLYCOSYLPHOSPHATIDYLINOSITOL_GPI_ANCHOR_BIOSYNTHESIS
KEGG GLYCEROPHOSPHOLIPID METABOLISM	http://www.broadinstitute.org/gsea/msigdb/cards/KEGG_GLYCEROPHOSPHOLIPID_METABOLISM
KEGG ETHER LIPID METABOLISM	http://www.broadinstitute.org/gsea/msigdb/cards/KEGG_ETHER_LIPID_METABOLISM
KEGG ARACHIDONIC ACID METABOLISM	http://www.broadinstitute.org/gsea/msigdb/cards/KEGG_ARACHIDONIC_ACID_METABOLISM
KEGG LINOLEIC ACID METABOLISM	http://www.broadinstitute.org/gsea/msigdb/cards/KEGG_LINOLEIC_ACID_METABOLISM
KEGG ALPHA LINOLENIC ACID METABOLISM	http://www.broadinstitute.org/gsea/msigdb/cards/KEGG_ALPHA_LINOLENIC_ACID_METABOLISM
KEGG SPHINGOLIPID METABOLISM	http://www.broadinstitute.org/gsea/msigdb/cards/KEGG_SPHINGOLIPID_METABOLISM
KEGG GLYCOSPHINGOLIPID BIOSYNTHESIS LACTO AND NEOLACTO SERIES	http://www.broadinstitute.org/gsea/msigdb/cards/KEGG_GLYCOSPHINGOLIPID_BIOSYNTHESIS_LACTO_AND_NEOLACTO_SERIES
KEGG GLYCOSPHINGOLIPID BIOSYNTHESIS GLOBO SERIES	http://www.broadinstitute.org/gsea/msigdb/cards/KEGG_GLYCOSPHINGOLIPID_BIOSYNTHESIS_GLOBO_SERIES
KEGG GLYCOSPHINGOLIPID BIOSYNTHESIS GANGLIO SERIES	http://www.broadinstitute.org/gsea/msigdb/cards/KEGG_GLYCOSPHINGOLIPID_BIOSYNTHESIS_GANGLIO_SERIES
KEGG PYRUVATE METABOLISM	http://www.broadinstitute.org/gsea/msigdb/cards/KEGG_PYRUVATE_METABOLISM
KEGG GLYOXYLATE AND DICARBOXYLATE METABOLISM	http://www.broadinstitute.org/gsea/msigdb/cards/KEGG_GLYOXYLATE_AND_DICARBOXYLATE_METABOLISM
KEGG PROPANOATE METABOLISM	http://www.broadinstitute.org/gsea/msigdb/cards/KEGG_PROPANOATE_METABOLISM
KEGG BUTANOATE METABOLISM	http://www.broadinstitute.org/gsea/msigdb/cards/KEGG_BUTANOATE_METABOLISM
KEGG ONE CARBON POOL BY FOLATE	http://www.broadinstitute.org/gsea/msigdb/cards/KEGG_ONE_CARBON_POOL_BY_FOLATE
KEGG RIBOFLAVIN METABOLISM	http://www.broadinstitute.org/gsea/msigdb/cards/KEGG_RIBOFLAVIN_METABOLISM
KEGG NICOTINATE AND NICOTINAMIDE METABOLISM	http://www.broadinstitute.org/gsea/msigdb/cards/KEGG_NICOTINATE_AND_NICOTINAMIDE_METABOLISM
KEGG PANTOTHENATE AND COA BIOSYNTHESIS	http://www.broadinstitute.org/gsea/msigdb/cards/KEGG_PANTOTHENATE_AND_COA_BIOSYNTHESIS
KEGG FOLATE BIOSYNTHESIS	http://www.broadinstitute.org/gsea/msigdb/cards/KEGG_FOLATE_BIOSYNTHESIS
KEGG RETINOL METABOLISM	http://www.broadinstitute.org/gsea/msigdb/cards/KEGG_RETINOL_METABOLISM
KEGG PORPHYRIN AND CHLOROPHYLL METABOLISM	http://www.broadinstitute.org/gsea/msigdb/cards/KEGG_PORPHYRIN_AND_CHLOROPHYLL_METABOLISM
KEGG TERPENOID BACKBONE BIOSYNTHESIS	http://www.broadinstitute.org/gsea/msigdb/cards/KEGG_TERPENOID_BACKBONE_BIOSYNTHESIS
KEGG LIMONENE AND PINENE DEGRADATION	http://www.broadinstitute.org/gsea/msigdb/cards/KEGG_LIMONENE_AND_PINENE_DEGRADATION
KEGG NITROGEN METABOLISM	http://www.broadinstitute.org/gsea/msigdb/cards/KEGG_NITROGEN_METABOLISM
KEGG SULFUR METABOLISM	http://www.broadinstitute.org/gsea/msigdb/cards/KEGG_SULFUR_METABOLISM
KEGG AMINOACYL TRNA BIOSYNTHESIS	http://www.broadinstitute.org/gsea/msigdb/cards/KEGG_AMINOACYL_TRNA_BIOSYNTHESIS
KEGG METABOLISM OF XENOBIOTICS BY CYTOCHROME P450	http://www.broadinstitute.org/gsea/msigdb/cards/KEGG_METABOLISM_OF_XENOBIOTICS_BY_CYTOCHROME_P450
KEGG DRUG METABOLISM CYTOCHROME P450	http://www.broadinstitute.org/gsea/msigdb/cards/KEGG_DRUG_METABOLISM_CYTOCHROME_P450
KEGG DRUG METABOLISM OTHER ENZYMES	http://www.broadinstitute.org/gsea/msigdb/cards/KEGG_DRUG_METABOLISM_OTHER_ENZYMES
KEGG BIOSYNTHESIS OF UNSATURATED FATTY ACIDS	http://www.broadinstitute.org/gsea/msigdb/cards/KEGG_BIOSYNTHESIS_OF_UNSATURATED_FATTY_ACIDS
